# Supplementary material
Source: Research Square preprint supplement (doi:10.21203/rs.3.rs-13118/v4)
Supplement: Supplementary file 1 [file 228f7608f3f80d649c5c9386.xlsx]

## Sheet: collectivity
Table S4. Distribution of major stress-related and phytohormone-related cis-acing elements in the promoter regions of GhPHD genes.
gene name	site name	sequence	position	matrix score	strand	organism	function
GhPHD1	ABRE	ACGTG	965	5	-	Arabidopsis thaliana	abscisic acid responsiveness
GhPHD1	TGA-element	AACGAC	477	6	+	Brassica oleracea	auxin-responsive
GhPHD1	G-box	TACGTG	965	6	-	Arabidopsis thaliana	light responsiveness
GhPHD1	TC-rich repeats	ATTCTCTAAC	335	9	-	Nicotiana tabacum	defense and stress responsiveness
GhPHD1	AuxRR-core	GGTCCAT	896	7	+	Nicotiana tabacum	auxin-responsive
GhPHD1	AuxRR-core	GGTCCAT	896	7	+	Nicotiana tabacum	auxin-responsive
GhPHD1	GARE-motif	TCTGTTG	52	7	-	Brassica oleracea	gibberellin-responsiveness
GhPHD1	MBS	CAACTG	1160	6	-	Arabidopsis thaliana	drought-responsiveness
GhPHD1	ERE	ATTTTAAA	141	8	+	Nicotiana glutinos	ethylene-responsiveness
GhPHD1	ERE	ATTTTAAA	1258	8	+	Nicotiana glutinos	ethylene-responsiveness
GhPHD2	G-box	TAAACGTG	703	8	+	Brassica oleracea	light responsiveness
GhPHD2	ABRE	ACGTG	706	5	+	Arabidopsis thaliana	abscisic acid responsiveness
GhPHD2	TC-rich repeats	ATTCTCTAAC	827	9	-	Nicotiana tabacum	defense and stress responsiveness
GhPHD2	TCA-element	CCATCTTTTT	804	9	-	Nicotiana tabacum	salicylic acid responsiveness
GhPHD2	P-box	CCTTTTG	1312	7	-	Oryza sativa	gibberellin-responsiveness
GhPHD2	G-Box	CACGTT	705	6	-	Pisum sativum	light responsiveness
GhPHD2	ERE	ATTTTAAA	366	8	-	Nicotiana glutinos	ethylene-responsiveness
GhPHD2	ERE	ATTTTAAA	1195	8	-	Nicotiana glutinos	ethylene-responsiveness
GhPHD2	ERE	ATTTTAAA	1202	8	-	Nicotiana glutinos	ethylene-responsiveness
GhPHD3	MBS	CAACTG	1037	6	+	Arabidopsis thaliana	drought-responsiveness
GhPHD3	ERE	ATTTTAAA	700	8	-	Nicotiana glutinos	ethylene-responsiveness
GhPHD3	ERE	ATTTTAAA	1152	8	+	Nicotiana glutinos	ethylene-responsiveness
GhPHD3	ERE	ATTTTAAA	1154	8	-	Nicotiana glutinos	ethylene-responsiveness
GhPHD3	CGTCA-motif	CGTCA	618	5	+	Hordeum vulgare	MeJA-responsiveness
GhPHD3	P-box	CCTTTTG	1144	7	+	Oryza sativa	gibberellin-responsiveness
GhPHD4	CGTCA-motif	CGTCA	1424	5	+	Hordeum vulgare	MeJA-responsiveness
GhPHD4	G-box	CACGAC	923	6	+	Zea mays	light responsiveness
GhPHD4	MBS	CAACTG	89	6	+	Arabidopsis thaliana	drought-responsiveness
GhPHD4	LTR	CCGAAA	904	6	-	Hordeum vulgare	low-temperature responsiveness
GhPHD4	ERE	ATTTTAAA	337	8	-	Nicotiana glutinos	ethylene-responsiveness
GhPHD4	ERE	ATTTTAAA	621	8	-	Nicotiana glutinos	ethylene-responsiveness
GhPHD4	ERE	ATTTTAAA	1439	8	-	Nicotiana glutinos	ethylene-responsiveness
GhPHD5	ERE	ATTTTAAA	800	8	+	Nicotiana glutinos	ethylene-responsiveness
GhPHD5	ERE	ATTTTAAA	932	8	+	Nicotiana glutinos	ethylene-responsiveness
GhPHD5	ERE	ATTTTAAA	934	8	-	Nicotiana glutinos	ethylene-responsiveness
GhPHD5	GARE-motif	TCTGTTG	1199	7	-	Brassica oleracea	gibberellin-responsiveness
GhPHD5	P-box	CCTTTTG	109	7	-	Oryza sativa	gibberellin-responsiveness
GhPHD5	TC-rich repeats	GTTTTCTTAC	1254	9	-	Nicotiana tabacum	defense and stress responsiveness
GhPHD5	TCA-element	CCATCTTTTT	566	9	-	Nicotiana tabacum	salicylic acid responsiveness
GhPHD5	TGA-element	AACGAC	125	6	-	Brassica oleracea	auxin-responsive
GhPHD5	ABRE	ACGTG	1006	5	-	Arabidopsis thaliana	abscisic acid responsiveness
GhPHD5	CGTCA-motif	CGTCA	1008	5	+	Hordeum vulgare	MeJA-responsiveness
GhPHD5	CGTCA-motif	CGTCA	1283	5	-	Hordeum vulgare	MeJA-responsiveness
GhPHD5	CGTCA-motif	CGTCA	1361	5	-	Hordeum vulgare	MeJA-responsiveness
GhPHD5	G-box	CACGTC	1006	6	+	Zea mays	light responsiveness
GhPHD6	TATC-box	TATCCCA	94	7	+	Oryza sativa	gibberellin-responsiveness
GhPHD6	TATC-box	TATCCCA	315	7	-	Oryza sativa	gibberellin-responsiveness
GhPHD6	TCA-element	CCATCTTTTT	176	9	-	Nicotiana tabacum	salicylic acid responsiveness
GhPHD6	LTR	CCGAAA	740	6	+	Hordeum vulgare	low-temperature responsiveness
GhPHD6	ERE	ATTTTAAA	1191	8	+	Nicotiana glutinos	ethylene-responsiveness
GhPHD6	MBS	CAACTG	307	6	-	Arabidopsis thaliana	drought-responsiveness
GhPHD6	MBS	CAACTG	545	6	+	Arabidopsis thaliana	drought-responsiveness
GhPHD7	TATC-box	TATCCCA	93	7	+	Oryza sativa	gibberellin-responsiveness
GhPHD7	TATC-box	TATCCCA	314	7	-	Oryza sativa	gibberellin-responsiveness
GhPHD7	TCA-element	CCATCTTTTT	175	9	-	Nicotiana tabacum	salicylic acid responsiveness
GhPHD7	MBS	CAACTG	306	6	-	Arabidopsis thaliana	drought-responsiveness
GhPHD7	MBS	CAACTG	544	6	+	Arabidopsis thaliana	drought-responsiveness
GhPHD7	ERE	ATTTTAAA	1191	8	+	Nicotiana glutinos	ethylene-responsiveness
GhPHD7	LTR	CCGAAA	739	6	+	Hordeum vulgare	low-temperature responsiveness
GhPHD8	MBS	CAACTG	98	6	-	Arabidopsis thaliana	drought-responsiveness
GhPHD8	ERE	ATTTTAAA	810	8	+	Nicotiana glutinos	ethylene-responsiveness
GhPHD8	ERE	ATTTTAAA	1132	8	+	Nicotiana glutinos	ethylene-responsiveness
GhPHD8	G-Box	CACGTT	695	6	-	Pisum sativum	light responsiveness
GhPHD8	ABRE	ACGTG	696	5	+	Arabidopsis thaliana	abscisic acid responsiveness
GhPHD9	ABRE	TACGGTC	210	7	-	Arabidopsis thaliana	abscisic acid responsiveness
GhPHD9	ERE	ATTTTAAA	516	8	-	Nicotiana glutinos	ethylene-responsiveness
GhPHD9	ERE	ATTTTAAA	1301	8	-	Nicotiana glutinos	ethylene-responsiveness
GhPHD9	LTR	CCGAAA	73	6	-	Hordeum vulgare	low-temperature responsiveness
GhPHD10	circadian	CAAAGATATC	701	9	-	Lycopersicon esculentum	circadian control
GhPHD10	MBS	CAACTG	77	6	+	Arabidopsis thaliana	drought-responsiveness
GhPHD10	LTR	CCGAAA	1426	6	-	Hordeum vulgare	low-temperature responsiveness
GhPHD10	TC-rich repeats	GTTTTCTTAC	1324	9	+	Nicotiana tabacum	defense and stress responsiveness
GhPHD11	GARE-motif	TCTGTTG	501	7	-	Brassica oleracea	gibberellin-responsiveness
GhPHD11	MBS	CAACTG	216	6	-	Arabidopsis thaliana	drought-responsiveness
GhPHD11	ERE	ATTTCATA	130	8	+	Nicotiana glutinos	ethylene-responsiveness
GhPHD11	ERE	ATTTTAAA	1171	8	-	Nicotiana glutinos	ethylene-responsiveness
GhPHD11	ERE	ATTTTAAA	1465	8	+	Nicotiana glutinos	ethylene-responsiveness
GhPHD11	CGTCA-motif	CGTCA	665	5	-	Hordeum vulgare	MeJA-responsiveness
GhPHD11	ABRE	ACGTG	451	5	+	Arabidopsis thaliana	abscisic acid responsiveness
GhPHD11	ABRE	ACGTG	492	5	+	Arabidopsis thaliana	abscisic acid responsiveness
GhPHD11	ABRE	ACGTG	667	5	+	Arabidopsis thaliana	abscisic acid responsiveness
GhPHD11	G-box	CCACGTAA	449	8	-	Brassica napus	light responsiveness
GhPHD11	G-box	TACGTG	450	6	+	Arabidopsis thaliana	light responsiveness
GhPHD11	G-box	TACGTG	491	6	+	Arabidopsis thaliana	light responsiveness
GhPHD11	G-box	CACGTC	666	6	-	Zea mays	light responsiveness
GhPHD12	ERE	ATTTTAAA	92	8	+	Nicotiana glutinos	ethylene-responsiveness
GhPHD12	ERE	ATTTTAAA	94	8	-	Nicotiana glutinos	ethylene-responsiveness
GhPHD12	ERE	ATTTCATA	653	8	-	Nicotiana glutinos	ethylene-responsiveness
GhPHD12	ABRE	ACGTG	873	5	+	Arabidopsis thaliana	abscisic acid responsiveness
GhPHD12	G-box	CACGTC	872	6	-	Zea mays	light responsiveness
GhPHD13	G-box	CACGTG	1455	6	-	Arabidopsis thaliana	light responsiveness
GhPHD13	TATC-box	TATCCCA	420	7	-	Oryza sativa	gibberellin-responsiveness
GhPHD13	ABRE	CACGTG	1455	6	-	Arabidopsis thaliana	abscisic acid responsiveness
GhPHD13	ABRE	ACGTG	1456	5	+	Arabidopsis thaliana	abscisic acid responsiveness
GhPHD13	CGTCA-motif	CGTCA	663	5	+	Hordeum vulgare	MeJA-responsiveness
GhPHD13	CGTCA-motif	CGTCA	1271	5	-	Hordeum vulgare	MeJA-responsiveness
GhPHD13	G-Box	CACGTG	1455	6	-	Pisum sativum	light responsiveness
GhPHD13	TCA-element	CCATCTTTTT	600	9	-	Nicotiana tabacum	salicylic acid responsiveness
GhPHD13	ERE	ATTTTAAA	40	8	+	Nicotiana glutinos	ethylene-responsiveness
GhPHD13	ERE	ATTTTAAA	1035	8	+	Nicotiana glutinos	ethylene-responsiveness
GhPHD14	GARE-motif	TCTGTTG	881	7	-	Brassica oleracea	gibberellin-responsiveness
GhPHD14	ERE	ATTTTAAA	407	8	+	Nicotiana glutinos	ethylene-responsiveness
GhPHD14	ERE	ATTTTAAA	598	8	-	Nicotiana glutinos	ethylene-responsiveness
GhPHD14	ABRE	ACGTG	1163	5	-	Arabidopsis thaliana	abscisic acid responsiveness
GhPHD14	TATC-box	TATCCCA	40	7	-	Oryza sativa	gibberellin-responsiveness
GhPHD14	TATC-box	TATCCCA	718	7	-	Oryza sativa	gibberellin-responsiveness
GhPHD14	G-box	CACGTC	1163	6	+	Zea mays	light responsiveness
GhPHD15	G-box	CACGAC	67	6	-	Zea mays	light responsiveness
GhPHD15	ABRE	ACGTG	210	5	+	Arabidopsis thaliana	abscisic acid responsiveness
GhPHD15	TGA-element	AACGAC	187	6	-	Brassica oleracea	auxin-responsive
GhPHD15	TC-rich repeats	GTTTTCTTAC	877	10	+	Nicotiana tabacum	defense and stress responsiveness
GhPHD15	G-Box	CACGTT	209	6	-	Pisum sativum	light responsiveness
GhPHD15	ERE	ATTTTAAA	139	8	-	Nicotiana glutinos	ethylene-responsiveness
GhPHD15	ERE	ATTTCATA	260	8	+	Nicotiana glutinos	ethylene-responsiveness
GhPHD15	ERE	ATTTTAAA	893	8	-	Nicotiana glutinos	ethylene-responsiveness
GhPHD15	ERE	ATTTTAAA	960	8	+	Nicotiana glutinos	ethylene-responsiveness
GhPHD15	ERE	ATTTTAAA	962	8	-	Nicotiana glutinos	ethylene-responsiveness
GhPHD15	ERE	ATTTTAAA	1049	8	-	Nicotiana glutinos	ethylene-responsiveness
GhPHD15	LTR	CCGAAA	194	6	-	Hordeum vulgare	low-temperature responsiveness
GhPHD15	circadian	CAAAGATATC	603	9	-	Lycopersicon esculentum	circadian control
GhPHD16	CGTCA-motif	CGTCA	112	5	-	Hordeum vulgare	MeJA-responsiveness
GhPHD16	CGTCA-motif	CGTCA	382	5	-	Hordeum vulgare	MeJA-responsiveness
GhPHD16	CGTCA-motif	CGTCA	1369	5	+	Hordeum vulgare	MeJA-responsiveness
GhPHD16	TCA-element	CCATCTTTTT	1437	9	+	Nicotiana tabacum	salicylic acid responsiveness
GhPHD16	ERE	ATTTTAAA	461	8	-	Nicotiana glutinos	ethylene-responsiveness
GhPHD17	TCA-element	CCATCTTTTT	1089	9	+	Nicotiana tabacum	salicylic acid responsiveness
GhPHD17	G-Box	CACGTG	549	6	+	Pisum sativum	light responsiveness
GhPHD17	G-box	CACGTG	549	6	+	Arabidopsis thaliana	light responsiveness
GhPHD17	G-box	CCACGTAA	1238	8	-	Brassica napus	light responsiveness
GhPHD17	G-box	TACGTG	1239	6	+	Arabidopsis thaliana	light responsiveness
GhPHD17	TATC-box	TATCCCA	1140	7	-	Oryza sativa	gibberellin-responsiveness
GhPHD17	ABRE	CACGTG	549	6	+	Arabidopsis thaliana	abscisic acid responsiveness
GhPHD17	ABRE	ACGTG	550	5	+	Arabidopsis thaliana	abscisic acid responsiveness
GhPHD17	ABRE	ACGTG	1240	5	+	Arabidopsis thaliana	abscisic acid responsiveness
GhPHD18	P-box	CCTTTTG	1347	7	+	Oryza sativa	gibberellin-responsiveness
GhPHD18	TC-rich repeats	GTTTTCTTAC	633	9	-	Nicotiana tabacum	defense and stress responsiveness
GhPHD18	ERE	ATTTTAAA	137	8	+	Nicotiana glutinos	ethylene-responsiveness
GhPHD18	ERE	ATTTCATA	1305	8	-	Nicotiana glutinos	ethylene-responsiveness
GhPHD18	ABRE	ACGTG	995	5	+	Arabidopsis thaliana	abscisic acid responsiveness
GhPHD18	G-box	CACGTC	994	6	-	Zea mays	light responsiveness
GhPHD19	MBS	CAACTG	242	6	+	Arabidopsis thaliana	drought-responsiveness
GhPHD19	ABRE	ACGTG	214	5	+	Arabidopsis thaliana	abscisic acid responsiveness
GhPHD19	TATC-box	TATCCCA	1250	7	+	Oryza sativa	gibberellin-responsiveness
GhPHD19	G-Box	CACGTT	213	6	-	Pisum sativum	light responsiveness
GhPHD19	TC-rich repeats	GTTTTCTTAC	1405	9	+	Nicotiana tabacum	defense and stress responsiveness
GhPHD20	MBS	CAACTG	1373	6	-	Arabidopsis thaliana	drought-responsiveness
GhPHD20	ABRE	ACGTG	692	5	-	Arabidopsis thaliana	abscisic acid responsiveness
GhPHD20	ABRE	ACGTG	1336	5	+	Arabidopsis thaliana	abscisic acid responsiveness
GhPHD20	CGTCA-motif	CGTCA	1334	5	-	Hordeum vulgare	MeJA-responsiveness
GhPHD20	G-box	CACGTC	1335	6	-	Zea mays	light responsiveness
GhPHD20	G-Box	CACGTT	692	6	+	Pisum sativum	light responsiveness
GhPHD20	P-box	CCTTTTG	429	7	+	Oryza sativa	gibberellin-responsiveness
GhPHD20	TC-rich repeats	ATTCTCTAAC	199	9	-	Nicotiana tabacum	defense and stress responsiveness
GhPHD21	ERE	ATTTTAAA	1237	8	+	Nicotiana glutinos	ethylene-responsiveness
GhPHD21	ERE	ATTTTAAA	1387	8	+	Nicotiana glutinos	ethylene-responsiveness
GhPHD21	LTR	CCGAAA	942	6	-	Hordeum vulgare	low-temperature responsiveness
GhPHD21	LTR	CCGAAA	950	6	-	Hordeum vulgare	low-temperature responsiveness
GhPHD21	GARE-motif	TCTGTTG	303	7	-	Brassica oleracea	gibberellin-responsiveness
GhPHD21	CGTCA-motif	CGTCA	781	5	+	Hordeum vulgare	MeJA-responsiveness
GhPHD22	GARE-motif	TCTGTTG	611	7	+	Brassica oleracea	gibberellin-responsiveness
GhPHD22	MBS	CAACTG	31	6	-	Arabidopsis thaliana	drought-responsiveness
GhPHD22	MBS	CAACTG	1185	6	-	Arabidopsis thaliana	drought-responsiveness
GhPHD22	TGA-element	AACGAC	998	6	+	Brassica oleracea	auxin-responsive
GhPHD22	CGTCA-motif	CGTCA	238	5	-	Hordeum vulgare	MeJA-responsiveness
GhPHD22	G-box	TAACACGTAG	845	9	+	Brassica oleracea	light responsiveness
GhPHD23	CGTCA-motif	CGTCA	451	5	+	Hordeum vulgare	MeJA-responsiveness
GhPHD24	ABRE	ACGTG	697	5	+	Arabidopsis thaliana	abscisic acid responsiveness
GhPHD24	G-box	TACGTG	696	6	+	Arabidopsis thaliana	light responsiveness
GhPHD24	TC-rich repeats	ATTCTCTAAC	773	9	-	Nicotiana tabacum	defense and stress responsiveness
GhPHD24	TCA-element	CCATCTTTTT	848	9	+	Nicotiana tabacum	salicylic acid responsiveness
GhPHD24	ERE	ATTTTAAA	670	8	-	Nicotiana glutinos	ethylene-responsiveness
GhPHD24	ERE	ATTTTAAA	1222	8	+	Nicotiana glutinos	ethylene-responsiveness
GhPHD24	ERE	ATTTTAAA	1425	8	+	Nicotiana glutinos	ethylene-responsiveness
GhPHD24	ERE	ATTTTAAA	1442	8	+	Nicotiana glutinos	ethylene-responsiveness
GhPHD24	ERE	ATTTTAAA	1444	8	-	Nicotiana glutinos	ethylene-responsiveness
GhPHD25	ERE	ATTTTAAA	852	8	-	Nicotiana glutinos	ethylene-responsiveness
GhPHD25	ERE	ATTTTAAA	1119	8	+	Nicotiana glutinos	ethylene-responsiveness
GhPHD25	ERE	ATTTTAAA	1121	8	-	Nicotiana glutinos	ethylene-responsiveness
GhPHD25	G-box	TACGTG	141	6	+	Arabidopsis thaliana	light responsiveness
GhPHD25	ABRE	TACGGTC	30	7	+	Arabidopsis thaliana	abscisic acid responsiveness
GhPHD25	ABRE	ACGTG	142	5	+	Arabidopsis thaliana	abscisic acid responsiveness
GhPHD25	CGTCA-motif	CGTCA	955	5	+	Hordeum vulgare	MeJA-responsiveness
GhPHD25	TCA-element	CCATCTTTTT	1426	9	-	Nicotiana tabacum	salicylic acid responsiveness
GhPHD26	TC-rich repeats	ATTCTCTAAC	897	9	+	Nicotiana tabacum	defense and stress responsiveness
GhPHD26	P-box	CCTTTTG	932	7	-	Oryza sativa	gibberellin-responsiveness
GhPHD26	G-Box	CACGTG	544	6	+	Pisum sativum	light responsiveness
GhPHD26	G-box	CACGTG	544	6	+	Arabidopsis thaliana	light responsiveness
GhPHD26	ABRE	CACGTG	544	6	+	Arabidopsis thaliana	abscisic acid responsiveness
GhPHD26	ABRE	ACGTG	545	5	+	Arabidopsis thaliana	abscisic acid responsiveness
GhPHD26	LTR	CCGAAA	527	6	-	Hordeum vulgare	low-temperature responsiveness
GhPHD26	MBS	CAACTG	903	6	+	Arabidopsis thaliana	drought-responsiveness
GhPHD26	circadian	CAAAGATATC	1252	9	+	Lycopersicon esculentum	circadian control
GhPHD26	circadian	CAAAGATATC	1379	9	+	Lycopersicon esculentum	circadian control
GhPHD27	LTR	CCGAAA	264	6	-	Hordeum vulgare	low-temperature responsiveness
GhPHD27	LTR	CCGAAA	1203	6	-	Hordeum vulgare	low-temperature responsiveness
GhPHD27	ERE	ATTTCATA	53	8	+	Nicotiana glutinos	ethylene-responsiveness
GhPHD27	MBS	CAACTG	1073	6	+	Arabidopsis thaliana	drought-responsiveness
GhPHD27	TATC-box	TATCCCA	1094	7	+	Oryza sativa	gibberellin-responsiveness
GhPHD27	CGTCA-motif	CGTCA	200	5	+	Hordeum vulgare	MeJA-responsiveness
GhPHD28	circadian	CAAAGATATC	941	9	-	Lycopersicon esculentum	circadian control
GhPHD28	LTR	CCGAAA	643	6	+	Hordeum vulgare	low-temperature responsiveness
GhPHD28	ERE	ATTTTAAA	253	8	+	Nicotiana glutinos	ethylene-responsiveness
GhPHD28	ERE	ATTTTAAA	960	8	+	Nicotiana glutinos	ethylene-responsiveness
GhPHD28	ERE	ATTTTAAA	1449	8	+	Nicotiana glutinos	ethylene-responsiveness
GhPHD28	G-box	TACGTG	1318	6	-	Arabidopsis thaliana	light responsiveness
GhPHD28	ABRE	AACCCGG	1101	7	+	Arabidopsis thaliana	abscisic acid responsiveness
GhPHD28	ABRE	ACGTG	1318	5	-	Arabidopsis thaliana	abscisic acid responsiveness
GhPHD28	P-box	CCTTTTG	380	7	+	Oryza sativa	gibberellin-responsiveness
GhPHD29	circadian	CAAAGATATC	446	9	-	Lycopersicon esculentum	circadian control
GhPHD29	CGTCA-motif	CGTCA	1369	5	-	Hordeum vulgare	MeJA-responsiveness
GhPHD29	ABRE	ACGTG	898	5	+	Arabidopsis thaliana	abscisic acid responsiveness
GhPHD29	G-Box	CACGTT	897	6	-	Pisum sativum	light responsiveness
GhPHD30	GARE-motif	TCTGTTG	1336	7	+	Brassica oleracea	gibberellin-responsiveness
GhPHD30	ABRE	ACGTG	86	5	-	Arabidopsis thaliana	abscisic acid responsiveness
GhPHD30	ABRE	ACGTG	289	5	-	Arabidopsis thaliana	abscisic acid responsiveness
GhPHD30	ABRE	ACGTG	1282	5	+	Arabidopsis thaliana	abscisic acid responsiveness
GhPHD30	CGTCA-motif	CGTCA	1208	5	+	Hordeum vulgare	MeJA-responsiveness
GhPHD30	G-box	TACGTG	86	6	-	Arabidopsis thaliana	light responsiveness
GhPHD30	G-box	CACGTC	289	6	+	Zea mays	light responsiveness
GhPHD30	G-Box	CACGTT	1281	6	-	Pisum sativum	light responsiveness
GhPHD30	TCA-element	CCATCTTTTT	519	9	-	Nicotiana tabacum	salicylic acid responsiveness
GhPHD31	P-box	CCTTTTG	1453	7	+	Oryza sativa	gibberellin-responsiveness
GhPHD31	G-Box	CACGTT	703	6	-	Pisum sativum	light responsiveness
GhPHD31	TCA-element	CCATCTTTTT	560	9	-	Nicotiana tabacum	salicylic acid responsiveness
GhPHD31	TCA-element	CCATCTTTTT	1385	9	+	Nicotiana tabacum	salicylic acid responsiveness
GhPHD31	G-box	CACGTC	365	6	+	Zea mays	light responsiveness
GhPHD31	G-box	CACGAC	658	6	+	Zea mays	light responsiveness
GhPHD31	ABRE	ACGTG	365	5	-	Arabidopsis thaliana	abscisic acid responsiveness
GhPHD31	ABRE	GCAACGTGTC	701	9	+	Hordeum vulgare	abscisic acid responsiveness
GhPHD31	ABRE	ACGTG	704	5	+	Arabidopsis thaliana	abscisic acid responsiveness
GhPHD31	CGTCA-motif	CGTCA	367	5	+	Hordeum vulgare	MeJA-responsiveness
GhPHD31	CGTCA-motif	CGTCA	1337	5	-	Hordeum vulgare	MeJA-responsiveness
GhPHD31	LTR	CCGAAA	1304	6	-	Hordeum vulgare	low-temperature responsiveness
GhPHD31	ERE	ATTTTAAA	555	8	-	Nicotiana glutinos	ethylene-responsiveness
GhPHD31	ERE	ATTTCATA	989	8	+	Nicotiana glutinos	ethylene-responsiveness
GhPHD31	ERE	ATTTTAAA	1254	8	-	Nicotiana glutinos	ethylene-responsiveness
GhPHD32	TCA-element	CCATCTTTTT	1300	9	+	Nicotiana tabacum	salicylic acid responsiveness
GhPHD32	ERE	ATTTTAAA	1131	8	-	Nicotiana glutinos	ethylene-responsiveness
GhPHD32	ERE	ATTTTAAA	1345	8	+	Nicotiana glutinos	ethylene-responsiveness
GhPHD32	MBS	CAACTG	647	6	-	Arabidopsis thaliana	drought-responsiveness
GhPHD33	P-box	CCTTTTG	504	7	-	Oryza sativa	gibberellin-responsiveness
GhPHD33	TC-rich repeats	GTTTTCTTAC	1337	9	+	Nicotiana tabacum	defense and stress responsiveness
GhPHD33	G-box	CACGAC	1216	6	+	Zea mays	light responsiveness
GhPHD34	G-box	TACGTG	1070	6	-	Arabidopsis thaliana	light responsiveness
GhPHD34	G-box	CACGTC	1414	6	-	Zea mays	light responsiveness
GhPHD34	CGTCA-motif	CGTCA	1413	5	-	Hordeum vulgare	MeJA-responsiveness
GhPHD34	ABRE	TACGTGTC	1068	8	-	Oryza sativa	abscisic acid responsiveness
GhPHD34	ABRE	ACGTG	1070	5	-	Arabidopsis thaliana	abscisic acid responsiveness
GhPHD34	ABRE	ACGTG	1415	5	+	Arabidopsis thaliana	abscisic acid responsiveness
GhPHD34	TC-rich repeats	ATTCTCTAAC	914	10	-	Nicotiana tabacum	defense and stress responsiveness
GhPHD34	ERE	ATTTTAAA	371	8	-	Nicotiana glutinos	ethylene-responsiveness
GhPHD34	ERE	ATTTTAAA	814	8	-	Nicotiana glutinos	ethylene-responsiveness
GhPHD35	ERE	ATTTTAAA	235	8	+	Nicotiana glutinos	ethylene-responsiveness
GhPHD35	ERE	ATTTTAAA	237	8	-	Nicotiana glutinos	ethylene-responsiveness
GhPHD35	ERE	ATTTTAAA	415	8	-	Nicotiana glutinos	ethylene-responsiveness
GhPHD35	ERE	ATTTTAAA	694	8	+	Nicotiana glutinos	ethylene-responsiveness
GhPHD35	ERE	ATTTTAAA	696	8	-	Nicotiana glutinos	ethylene-responsiveness
GhPHD35	ERE	ATTTTAAA	853	8	-	Nicotiana glutinos	ethylene-responsiveness
GhPHD35	ERE	ATTTTAAA	1346	8	+	Nicotiana glutinos	ethylene-responsiveness
GhPHD36	G-Box	CACGTGAAA	245	9	-	Pisum sativum	light responsiveness
GhPHD36	G-Box	CACGTG	248	6	+	Pisum sativum	light responsiveness
GhPHD36	G-Box	CACGTT	1093	6	+	Pisum sativum	light responsiveness
GhPHD36	TCA-element	CCATCTTTTT	1213	10	+	Nicotiana tabacum	salicylic acid responsiveness
GhPHD36	TCA-element	TCAGAAGAGG	1453	10	-	Brassica oleracea	salicylic acid responsiveness
GhPHD36	ABRE	CACGTG	248	6	+	Arabidopsis thaliana	abscisic acid responsiveness
GhPHD36	ABRE	ACGTG	249	5	+	Arabidopsis thaliana	abscisic acid responsiveness
GhPHD36	ABRE	ACGTG	263	5	-	Arabidopsis thaliana	abscisic acid responsiveness
GhPHD36	ABRE	ACGTG	1042	5	+	Arabidopsis thaliana	abscisic acid responsiveness
GhPHD36	ABRE	ACGTG	1093	5	-	Arabidopsis thaliana	abscisic acid responsiveness
GhPHD36	CGTCA-motif	CGTCA	522	5	-	Hordeum vulgare	MeJA-responsiveness
GhPHD36	CGTCA-motif	CGTCA	1040	5	-	Hordeum vulgare	MeJA-responsiveness
GhPHD36	CGTCA-motif	CGTCA	1232	5	+	Hordeum vulgare	MeJA-responsiveness
GhPHD36	G-box	CACGTG	248	6	+	Arabidopsis thaliana	light responsiveness
GhPHD36	G-box	TACGTG	263	6	-	Arabidopsis thaliana	light responsiveness
GhPHD36	G-box	CACGTC	1041	6	-	Zea mays	light responsiveness
GhPHD36	ERE	ATTTTAAA	662	8	-	Nicotiana glutinos	ethylene-responsiveness
GhPHD36	ERE	ATTTCATA	891	8	+	Nicotiana glutinos	ethylene-responsiveness
GhPHD36	ERE	ATTTTAAA	903	8	-	Nicotiana glutinos	ethylene-responsiveness
GhPHD36	ERE	ATTTTAAA	1310	8	+	Nicotiana glutinos	ethylene-responsiveness
GhPHD37	TATC-box	TATCCCA	1382	7	-	Oryza sativa	gibberellin-responsiveness
GhPHD37	LTR	CCGAAA	651	6	-	Hordeum vulgare	low-temperature responsiveness
GhPHD37	ERE	ATTTCATA	171	8	-	Nicotiana glutinos	ethylene-responsiveness
GhPHD37	ERE	ATTTCATA	822	8	+	Nicotiana glutinos	ethylene-responsiveness
GhPHD37	MBS	CAACTG	946	6	+	Arabidopsis thaliana	drought-responsiveness
GhPHD38	MBS	CAACTG	190	6	-	Arabidopsis thaliana	drought-responsiveness
GhPHD38	MBS	CAACTG	652	6	-	Arabidopsis thaliana	drought-responsiveness
GhPHD38	ERE	ATTTTAAA	204	8	-	Nicotiana glutinos	ethylene-responsiveness
GhPHD38	ERE	ATTTTAAA	465	8	-	Nicotiana glutinos	ethylene-responsiveness
GhPHD38	ERE	ATTTTAAA	471	8	+	Nicotiana glutinos	ethylene-responsiveness
GhPHD38	ERE	ATTTTAAA	473	8	-	Nicotiana glutinos	ethylene-responsiveness
GhPHD38	ERE	ATTTTAAA	1362	8	+	Nicotiana glutinos	ethylene-responsiveness
GhPHD38	ERE	ATTTTAAA	1392	8	+	Nicotiana glutinos	ethylene-responsiveness
GhPHD38	TCA-element	TCAGAAGAGG	733	9	-	Brassica oleracea	salicylic acid responsiveness
GhPHD38	TC-rich repeats	ATTCTCTAAC	16	9	-	Nicotiana tabacum	defense and stress responsiveness
GhPHD38	TGA-element	AACGAC	522	6	-	Brassica oleracea	auxin-responsive
GhPHD38	ABRE	ACGTG	910	5	+	Arabidopsis thaliana	abscisic acid responsiveness
GhPHD38	G-box	CACGTC	909	6	-	Zea mays	light responsiveness
GhPHD39	ERE	ATTTTAAA	120	8	-	Nicotiana glutinos	ethylene-responsiveness
GhPHD39	ERE	ATTTTAAA	263	8	-	Nicotiana glutinos	ethylene-responsiveness
GhPHD39	G-box	tgACACGTGGCA	1296	11	-	Lycopersicon esculentum	light responsiveness
GhPHD39	G-box	GCCACGTGGA	1297	9	-	Arabidopsis thaliana	light responsiveness
GhPHD39	G-box	CACGTG	1299	6	-	Arabidopsis thaliana	light responsiveness
GhPHD39	ABRE	GACACGTGGC	1297	9	-	Triticum aestivum	abscisic acid responsiveness
GhPHD39	ABRE	CACGTG	1299	6	-	Arabidopsis thaliana	abscisic acid responsiveness
GhPHD39	ABRE	ACGTG	1300	5	+	Arabidopsis thaliana	abscisic acid responsiveness
GhPHD39	G-Box	CACGTG	1299	6	-	Pisum sativum	light responsiveness
GhPHD40	LTR	CCGAAA	1085	6	+	Hordeum vulgare	low-temperature responsiveness
GhPHD40	ERE	ATTTTAAA	673	8	+	Nicotiana glutinos	ethylene-responsiveness
GhPHD40	ERE	ATTTTAAA	832	8	-	Nicotiana glutinos	ethylene-responsiveness
GhPHD40	ERE	ATTTTAAA	1057	8	+	Nicotiana glutinos	ethylene-responsiveness
GhPHD40	ERE	ATTTTAAA	1059	8	-	Nicotiana glutinos	ethylene-responsiveness
GhPHD40	MBS	CAACTG	1242	6	-	Arabidopsis thaliana	drought-responsiveness
GhPHD40	G-box	CACGTC	257	6	+	Zea mays	light responsiveness
GhPHD40	G-box	CACGTC	437	6	+	Zea mays	light responsiveness
GhPHD40	ABRE	ACGTG	251	5	+	Arabidopsis thaliana	abscisic acid responsiveness
GhPHD40	ABRE	ACGTG	257	5	-	Arabidopsis thaliana	abscisic acid responsiveness
GhPHD40	ABRE	ACGTG	431	5	+	Arabidopsis thaliana	abscisic acid responsiveness
GhPHD40	ABRE	ACGTG	437	5	-	Arabidopsis thaliana	abscisic acid responsiveness
GhPHD40	ABRE	ACGTG	1381	5	+	Arabidopsis thaliana	abscisic acid responsiveness
GhPHD40	CGTCA-motif	CGTCA	259	5	+	Hordeum vulgare	MeJA-responsiveness
GhPHD40	CGTCA-motif	CGTCA	439	5	+	Hordeum vulgare	MeJA-responsiveness
GhPHD40	TCA-element	CCATCTTTTT	42	9	+	Nicotiana tabacum	salicylic acid responsiveness
GhPHD40	TCA-element	CCATCTTTTT	811	9	+	Nicotiana tabacum	salicylic acid responsiveness
GhPHD40	G-Box	CACGTT	250	6	-	Pisum sativum	light responsiveness
GhPHD40	G-Box	CACGTT	430	6	-	Pisum sativum	light responsiveness
GhPHD40	G-Box	CACGTT	1380	6	-	Pisum sativum	light responsiveness
GhPHD41	TCA-element	CCATCTTTTT	278	9	-	Nicotiana tabacum	salicylic acid responsiveness
GhPHD41	TCA-element	CCATCTTTTT	401	9	-	Nicotiana tabacum	salicylic acid responsiveness
GhPHD41	ERE	ATTTTAAA	731	8	-	Nicotiana glutinos	ethylene-responsiveness
GhPHD41	ERE	ATTTTAAA	840	8	-	Nicotiana glutinos	ethylene-responsiveness
GhPHD41	ERE	ATTTTAAA	856	8	-	Nicotiana glutinos	ethylene-responsiveness
GhPHD41	ERE	ATTTTAAA	876	8	+	Nicotiana glutinos	ethylene-responsiveness
GhPHD41	circadian	CAAAGATATC	196	9	+	Lycopersicon esculentum	circadian control
GhPHD42	ERE	ATTTTAAA	687	8	+	Nicotiana glutinos	ethylene-responsiveness
GhPHD42	G-box	CCACGTAA	1231	8	+	Brassica napus	light responsiveness
GhPHD42	G-box	TACGTG	1232	6	-	Arabidopsis thaliana	light responsiveness
GhPHD42	G-box	CACGTC	1271	6	-	Zea mays	light responsiveness
GhPHD42	ABRE	ACGTG	1094	5	-	Arabidopsis thaliana	abscisic acid responsiveness
GhPHD42	ABRE	ACGTG	1232	5	-	Arabidopsis thaliana	abscisic acid responsiveness
GhPHD42	ABRE	ACGTG	1272	5	+	Arabidopsis thaliana	abscisic acid responsiveness
GhPHD42	TGA-element	AACGAC	1292	6	-	Brassica oleracea	auxin-responsive
GhPHD42	TGA-element	AACGAC	1347	6	+	Brassica oleracea	auxin-responsive
GhPHD42	CGTCA-motif	CGTCA	1270	5	-	Hordeum vulgare	MeJA-responsiveness
GhPHD42	P-box	CCTTTTG	1373	7	-	Oryza sativa	gibberellin-responsiveness
GhPHD42	G-Box	CACGTT	1094	6	+	Pisum sativum	light responsiveness
GhPHD42	TC-rich repeats	GTTTTCTTAC	131	9	-	Nicotiana tabacum	defense and stress responsiveness
GhPHD43	ERE	ATTTTAAA	70	8	-	Nicotiana glutinos	ethylene-responsiveness
GhPHD43	ERE	ATTTCATA	1149	8	+	Nicotiana glutinos	ethylene-responsiveness
GhPHD43	LTR	CCGAAA	609	6	+	Hordeum vulgare	low-temperature responsiveness
GhPHD43	LTR	CCGAAA	871	6	-	Hordeum vulgare	low-temperature responsiveness
GhPHD43	ABRE	ACGTG	1332	5	+	Arabidopsis thaliana	abscisic acid responsiveness
GhPHD43	ABRE	ACGTG	1352	5	-	Arabidopsis thaliana	abscisic acid responsiveness
GhPHD43	CGTCA-motif	CGTCA	772	5	+	Hordeum vulgare	MeJA-responsiveness
GhPHD43	CGTCA-motif	CGTCA	1139	5	-	Hordeum vulgare	MeJA-responsiveness
GhPHD43	CGTCA-motif	CGTCA	1330	5	-	Hordeum vulgare	MeJA-responsiveness
GhPHD43	CGTCA-motif	CGTCA	1354	5	+	Hordeum vulgare	MeJA-responsiveness
GhPHD43	G-box	CACGTC	1331	6	-	Zea mays	light responsiveness
GhPHD43	G-box	CACGTC	1352	6	+	Zea mays	light responsiveness
GhPHD43	TATC-box	TATCCCA	668	7	+	Oryza sativa	gibberellin-responsiveness
GhPHD44	MBS	CAACTG	744	6	-	Arabidopsis thaliana	drought-responsiveness
GhPHD44	MBS	CAACTG	1023	6	+	Arabidopsis thaliana	drought-responsiveness
GhPHD44	ERE	ATTTTAAA	31	8	-	Nicotiana glutinos	ethylene-responsiveness
GhPHD44	ERE	ATTTTAAA	661	8	-	Nicotiana glutinos	ethylene-responsiveness
GhPHD44	ERE	ATTTTAAA	1100	8	+	Nicotiana glutinos	ethylene-responsiveness
GhPHD44	ERE	ATTTTAAA	1102	8	-	Nicotiana glutinos	ethylene-responsiveness
GhPHD44	ERE	ATTTTAAA	1276	8	+	Nicotiana glutinos	ethylene-responsiveness
GhPHD44	LTR	CCGAAA	233	6	+	Hordeum vulgare	low-temperature responsiveness
GhPHD44	ABRE	ACGTG	219	5	-	Arabidopsis thaliana	abscisic acid responsiveness
GhPHD44	G-box	GCCACGTGGA	1014	9	-	Arabidopsis thaliana	light responsiveness
GhPHD44	G-Box	CACGTT	219	6	+	Pisum sativum	light responsiveness
GhPHD45	CGTCA-motif	CGTCA	1151	5	+	Hordeum vulgare	MeJA-responsiveness
GhPHD45	TC-rich repeats	GTTTTCTTAC	963	9	-	Nicotiana tabacum	defense and stress responsiveness
GhPHD45	TC-rich repeats	GTTTTCTTAC	1313	9	-	Nicotiana tabacum	defense and stress responsiveness
GhPHD45	LTR	CCGAAA	1106	6	+	Hordeum vulgare	low-temperature responsiveness
GhPHD45	MBS	CAACTG	559	6	+	Arabidopsis thaliana	drought-responsiveness
GhPHD46	TGA-element	AACGAC	47	6	+	Brassica oleracea	auxin-responsive
GhPHD46	CARE	CAACTCAC	35	8	+	Oryza sativa	gibberellin-responsiveness
GhPHD46	TC-rich repeats	GTTTTCTTAC	1446	9	+	Nicotiana tabacum	defense and stress responsiveness
GhPHD46	LTR	CCGAAA	94	6	-	Hordeum vulgare	low-temperature responsiveness
GhPHD46	ERE	ATTTTAAA	832	8	-	Nicotiana glutinos	ethylene-responsiveness
GhPHD46	ERE	ATTTTAAA	932	8	+	Nicotiana glutinos	ethylene-responsiveness
GhPHD47	TCA-element	CCATCTTTTT	143	9	+	Nicotiana tabacum	salicylic acid responsiveness
GhPHD47	P-box	CCTTTTG	473	7	-	Oryza sativa	gibberellin-responsiveness
GhPHD47	G-Box	CACGTT	1132	6	-	Pisum sativum	light responsiveness
GhPHD47	CGTCA-motif	CGTCA	14	5	-	Hordeum vulgare	MeJA-responsiveness
GhPHD47	CGTCA-motif	CGTCA	266	5	-	Hordeum vulgare	MeJA-responsiveness
GhPHD47	CGTCA-motif	CGTCA	302	5	-	Hordeum vulgare	MeJA-responsiveness
GhPHD47	ABRE	ACGTG	1133	5	+	Arabidopsis thaliana	abscisic acid responsiveness
GhPHD47	TGA-element	AACGAC	791	6	+	Brassica oleracea	auxin-responsive
GhPHD47	TGA-element	AACGAC	857	6	-	Brassica oleracea	auxin-responsive
GhPHD47	ERE	ATTTTAAA	1410	8	-	Nicotiana glutinos	ethylene-responsiveness
GhPHD47	MBS	CAACTG	43	6	+	Arabidopsis thaliana	drought-responsiveness
GhPHD47	GARE-motif	TCTGTTG	342	7	+	Brassica oleracea	gibberellin-responsiveness
GhPHD47	GARE-motif	TCTGTTG	531	7	+	Brassica oleracea	gibberellin-responsiveness
GhPHD48	G-Box	CACGTG	36	6	+	Pisum sativum	light responsiveness
GhPHD48	TCA-element	CCATCTTTTT	434	9	+	Nicotiana tabacum	salicylic acid responsiveness
GhPHD48	ABRE	GCCGCGTGGC	34	9	+	Oryza sativa	abscisic acid responsiveness
GhPHD48	ABRE	CACGTG	36	6	+	Arabidopsis thaliana	abscisic acid responsiveness
GhPHD48	ABRE	ACGTG	37	5	+	Arabidopsis thaliana	abscisic acid responsiveness
GhPHD48	G-box	GCCACGTGGA	34	9	+	Arabidopsis thaliana	light responsiveness
GhPHD48	G-box	CACGTG	36	6	+	Arabidopsis thaliana	light responsiveness
GhPHD48	TATC-box	TATCCCA	1062	7	+	Oryza sativa	gibberellin-responsiveness
GhPHD48	LTR	CCGAAA	709	6	+	Hordeum vulgare	low-temperature responsiveness
GhPHD48	GARE-motif	TCTGTTG	638	7	+	Brassica oleracea	gibberellin-responsiveness
GhPHD48	GARE-motif	TCTGTTG	1230	7	+	Brassica oleracea	gibberellin-responsiveness
GhPHD49	ERE	ATTTTAAA	198	8	+	Nicotiana glutinos	ethylene-responsiveness
GhPHD49	ERE	ATTTTAAA	885	8	-	Nicotiana glutinos	ethylene-responsiveness
GhPHD49	ERE	ATTTTAAA	1011	8	-	Nicotiana glutinos	ethylene-responsiveness
GhPHD49	ERE	ATTTTAAA	1128	8	+	Nicotiana glutinos	ethylene-responsiveness
GhPHD49	ERE	ATTTTAAA	1130	8	-	Nicotiana glutinos	ethylene-responsiveness
GhPHD49	TCA-element	TCAGAAGAGG	751	9	+	Brassica oleracea	salicylic acid responsiveness
GhPHD49	TC-rich repeats	GTTTTCTTAC	360	9	-	Nicotiana tabacum	defense and stress responsiveness
GhPHD50	TC-rich repeats	ATTCTCTAAC	56	9	-	Nicotiana tabacum	defense and stress responsiveness
GhPHD50	ABRE	ACGTG	764	5	-	Arabidopsis thaliana	abscisic acid responsiveness
GhPHD50	ABRE	AACCCGG	837	7	+	Arabidopsis thaliana	abscisic acid responsiveness
GhPHD50	CGTCA-motif	CGTCA	766	5	+	Hordeum vulgare	MeJA-responsiveness
GhPHD50	G-box	CACGTC	764	6	+	Zea mays	light responsiveness
GhPHD50	MBS	CAACTG	752	6	+	Arabidopsis thaliana	drought-responsiveness
GhPHD50	ERE	ATTTTAAA	179	8	+	Nicotiana glutinos	ethylene-responsiveness
GhPHD50	ERE	ATTTTAAA	181	8	-	Nicotiana glutinos	ethylene-responsiveness
GhPHD50	ERE	ATTTCATA	355	8	+	Nicotiana glutinos	ethylene-responsiveness
GhPHD50	ERE	ATTTTAAA	541	8	+	Nicotiana glutinos	ethylene-responsiveness
GhPHD50	ERE	ATTTTAAA	1324	8	+	Nicotiana glutinos	ethylene-responsiveness
GhPHD50	ERE	ATTTTAAA	1326	8	-	Nicotiana glutinos	ethylene-responsiveness
GhPHD50	GARE-motif	TCTGTTG	1156	7	+	Brassica oleracea	gibberellin-responsiveness
GhPHD51	G-Box	CACGTT	641	6	+	Pisum sativum	light responsiveness
GhPHD51	P-box	CCTTTTG	1288	7	+	Oryza sativa	gibberellin-responsiveness
GhPHD51	TCA-element	CCATCTTTTT	1013	9	-	Nicotiana tabacum	salicylic acid responsiveness
GhPHD51	ABRE	ACGTG	641	5	-	Arabidopsis thaliana	abscisic acid responsiveness
GhPHD51	ABRE	ACGTG	840	5	-	Arabidopsis thaliana	abscisic acid responsiveness
GhPHD51	CGTCA-motif	CGTCA	1041	5	+	Hordeum vulgare	MeJA-responsiveness
GhPHD51	CGTCA-motif	CGTCA	1050	5	+	Hordeum vulgare	MeJA-responsiveness
GhPHD51	G-box	TACGTG	840	6	-	Arabidopsis thaliana	light responsiveness
GhPHD51	circadian	CAAAGATATC	987	9	+	Lycopersicon esculentum	circadian control
GhPHD51	LTR	CCGAAA	313	6	+	Hordeum vulgare	low-temperature responsiveness
GhPHD51	LTR	CCGAAA	607	6	+	Hordeum vulgare	low-temperature responsiveness
GhPHD52	MBS	CAACTG	1347	6	-	Arabidopsis thaliana	drought-responsiveness
GhPHD53	ERE	ATTTTAAA	868	8	-	Nicotiana glutinos	ethylene-responsiveness
GhPHD53	ERE	ATTTTAAA	1151	8	+	Nicotiana glutinos	ethylene-responsiveness
GhPHD53	ERE	ATTTTAAA	1153	8	-	Nicotiana glutinos	ethylene-responsiveness
GhPHD53	MBS	CAACTG	174	6	+	Arabidopsis thaliana	drought-responsiveness
GhPHD53	G-box	TACGTG	254	6	-	Arabidopsis thaliana	light responsiveness
GhPHD53	CGTCA-motif	CGTCA	271	5	+	Hordeum vulgare	MeJA-responsiveness
GhPHD53	ABRE	ACGTG	254	5	-	Arabidopsis thaliana	abscisic acid responsiveness
GhPHD53	TCA-element	CCATCTTTTT	134	9	+	Nicotiana tabacum	salicylic acid responsiveness
GhPHD54	TGA-element	AACGAC	826	6	-	Brassica oleracea	auxin-responsive
GhPHD54	ABRE	TACGTGTC	1228	8	+	Oryza sativa	abscisic acid responsiveness
GhPHD54	ABRE	ACGTG	1229	5	+	Arabidopsis thaliana	abscisic acid responsiveness
GhPHD54	G-box	TACGTG	1228	6	+	Arabidopsis thaliana	light responsiveness
GhPHD54	CARE	CAACTCCC	569	8	-	Oryza sativa	gibberellin-responsiveness
GhPHD54	P-box	CCTTTTG	319	7	-	Oryza sativa	gibberellin-responsiveness
GhPHD54	MBS	CAACTG	428	6	-	Arabidopsis thaliana	drought-responsiveness
GhPHD54	ERE	ATTTCATA	396	8	+	Nicotiana glutinos	ethylene-responsiveness
GhPHD54	ERE	ATTTTAAA	606	8	-	Nicotiana glutinos	ethylene-responsiveness
GhPHD54	ERE	ATTTTAAA	969	8	+	Nicotiana glutinos	ethylene-responsiveness
GhPHD55	ERE	ATTTTAAA	215	8	+	Nicotiana glutinos	ethylene-responsiveness
GhPHD55	ERE	ATTTTAAA	691	8	-	Nicotiana glutinos	ethylene-responsiveness
GhPHD55	ERE	ATTTTAAA	1169	8	-	Nicotiana glutinos	ethylene-responsiveness
GhPHD55	MBS	CAACTG	962	6	-	Arabidopsis thaliana	drought-responsiveness
GhPHD55	GARE-motif	TCTGTTG	625	7	+	Brassica oleracea	gibberellin-responsiveness
GhPHD55	TCA-element	CCATCTTTTT	229	9	-	Nicotiana tabacum	salicylic acid responsiveness
GhPHD55	CGTCA-motif	CGTCA	1493	5	-	Hordeum vulgare	MeJA-responsiveness
GhPHD56	G-Box	CACGTT	1385	6	-	Pisum sativum	light responsiveness
GhPHD56	G-Box	CACGTG	1418	6	-	Pisum sativum	light responsiveness
GhPHD56	TCA-element	CCATCTTTTT	86	9	+	Nicotiana tabacum	salicylic acid responsiveness
GhPHD56	TC-rich repeats	GTTTTCTTAC	451	9	-	Nicotiana tabacum	defense and stress responsiveness
GhPHD56	G-box	TAAACGTG	1383	8	+	Brassica oleracea	light responsiveness
GhPHD56	G-box	GCCACGTGGA	1416	9	+	Arabidopsis thaliana	light responsiveness
GhPHD56	G-box	CACGTG	1418	6	-	Arabidopsis thaliana	light responsiveness
GhPHD56	CGTCA-motif	CGTCA	398	5	-	Hordeum vulgare	MeJA-responsiveness
GhPHD56	ABRE	ACGTG	1386	5	+	Arabidopsis thaliana	abscisic acid responsiveness
GhPHD56	ABRE	GACACGTGGC	1416	9	-	Triticum aestivum	abscisic acid responsiveness
GhPHD56	ABRE	CACGTG	1418	6	-	Arabidopsis thaliana	abscisic acid responsiveness
GhPHD56	ABRE	ACGTG	1419	5	+	Arabidopsis thaliana	abscisic acid responsiveness
GhPHD56	TGA-element	AACGAC	1334	6	+	Brassica oleracea	auxin-responsive
GhPHD56	circadian	CAAAGATATC	515	9	-	Lycopersicon esculentum	circadian control
GhPHD56	ERE	ATTTCATA	445	8	-	Nicotiana glutinos	ethylene-responsiveness
GhPHD56	ERE	ATTTTAAA	1128	8	-	Nicotiana glutinos	ethylene-responsiveness
GhPHD56	GARE-motif	TCTGTTG	1064	7	+	Brassica oleracea	gibberellin-responsiveness
GhPHD57	G-Box	CACGTG	662	6	+	Pisum sativum	light responsiveness
GhPHD57	TC-rich repeats	ATTCTCTAAC	45	9	-	Nicotiana tabacum	defense and stress responsiveness
GhPHD57	ABRE	CACGTG	662	6	+	Arabidopsis thaliana	abscisic acid responsiveness
GhPHD57	ABRE	ACGTG	663	5	+	Arabidopsis thaliana	abscisic acid responsiveness
GhPHD57	ABRE	ACGTG	1351	5	+	Arabidopsis thaliana	abscisic acid responsiveness
GhPHD57	ABRE	ACGTG	1404	5	+	Arabidopsis thaliana	abscisic acid responsiveness
GhPHD57	CGTCA-motif	CGTCA	1349	5	-	Hordeum vulgare	MeJA-responsiveness
GhPHD57	CGTCA-motif	CGTCA	1359	5	+	Hordeum vulgare	MeJA-responsiveness
GhPHD57	CGTCA-motif	CGTCA	1402	5	-	Hordeum vulgare	MeJA-responsiveness
GhPHD57	G-box	ACACGTGT	661	8	+	Brassica napus	light responsiveness
GhPHD57	G-box	CACGTG	662	6	+	Arabidopsis thaliana	light responsiveness
GhPHD57	G-box	CACGTC	1350	6	-	Zea mays	light responsiveness
GhPHD57	G-box	CACGTC	1403	6	-	Zea mays	light responsiveness
GhPHD57	ERE	ATTTTAAA	66	8	+	Nicotiana glutinos	ethylene-responsiveness
GhPHD57	ERE	ATTTTAAA	954	8	+	Nicotiana glutinos	ethylene-responsiveness
GhPHD57	AuxRR-core	GGTCCAT	595	7	+	Nicotiana tabacum	auxin-responsive
GhPHD57	AuxRR-core	GGTCCAT	595	7	+	Nicotiana tabacum	auxin-responsive
GhPHD57	GARE-motif	TCTGTTG	1278	7	-	Brassica oleracea	gibberellin-responsiveness
GhPHD58	ERE	ATTTTAAA	652	8	-	Nicotiana glutinos	ethylene-responsiveness
GhPHD58	ERE	ATTTTAAA	1208	8	-	Nicotiana glutinos	ethylene-responsiveness
GhPHD58	LTR	CCGAAA	483	6	+	Hordeum vulgare	low-temperature responsiveness
GhPHD58	P-box	CCTTTTG	45	7	+	Oryza sativa	gibberellin-responsiveness
GhPHD58	P-box	CCTTTTG	1314	7	-	Oryza sativa	gibberellin-responsiveness
GhPHD58	TC-rich repeats	ATTCTCTAAC	1119	9	-	Nicotiana tabacum	defense and stress responsiveness
GhPHD58	TATC-box	TATCCCA	269	7	+	Oryza sativa	gibberellin-responsiveness
GhPHD59	ABRE	AACCCGG	251	7	-	Arabidopsis thaliana	abscisic acid responsiveness
GhPHD59	ABRE	AACCCGG	262	7	-	Arabidopsis thaliana	abscisic acid responsiveness
GhPHD59	ERE	ATTTTAAA	134	8	-	Nicotiana glutinos	ethylene-responsiveness
GhPHD59	ERE	ATTTTAAA	723	8	-	Nicotiana glutinos	ethylene-responsiveness
GhPHD60	GARE-motif	TCTGTTG	1304	7	-	Brassica oleracea	gibberellin-responsiveness
GhPHD60	ERE	ATTTTAAA	693	8	+	Nicotiana glutinos	ethylene-responsiveness
GhPHD60	ERE	ATTTTAAA	695	8	-	Nicotiana glutinos	ethylene-responsiveness
GhPHD60	ERE	ATTTTAAA	811	8	-	Nicotiana glutinos	ethylene-responsiveness
GhPHD60	ERE	ATTTTAAA	1021	8	-	Nicotiana glutinos	ethylene-responsiveness
GhPHD60	ERE	ATTTTAAA	1027	8	+	Nicotiana glutinos	ethylene-responsiveness
GhPHD60	ERE	ATTTTAAA	1029	8	-	Nicotiana glutinos	ethylene-responsiveness
GhPHD60	LTR	CCGAAA	1494	6	+	Hordeum vulgare	low-temperature responsiveness
GhPHD60	CGTCA-motif	CGTCA	1388	5	-	Hordeum vulgare	MeJA-responsiveness
GhPHD60	CGTCA-motif	CGTCA	1415	5	+	Hordeum vulgare	MeJA-responsiveness
GhPHD60	CGTCA-motif	CGTCA	1465	5	-	Hordeum vulgare	MeJA-responsiveness
GhPHD60	ABRE	CACGTG	255	6	+	Arabidopsis thaliana	abscisic acid responsiveness
GhPHD60	ABRE	ACGTG	256	5	+	Arabidopsis thaliana	abscisic acid responsiveness
GhPHD60	ABRE	ACGTG	1338	5	+	Arabidopsis thaliana	abscisic acid responsiveness
GhPHD60	G-box	CACGTG	255	6	+	Arabidopsis thaliana	light responsiveness
GhPHD60	G-Box	CACGTG	255	6	+	Pisum sativum	light responsiveness
GhPHD60	G-Box	CACGTT	1337	6	-	Pisum sativum	light responsiveness
GhPHD60	TC-rich repeats	GTTTTCTTAC	1359	9	-	Nicotiana tabacum	defense and stress responsiveness
GhPHD61	ERE	ATTTTAAA	331	8	-	Nicotiana glutinos	ethylene-responsiveness
GhPHD61	P-box	CCTTTTG	574	7	-	Oryza sativa	gibberellin-responsiveness
GhPHD61	TC-rich repeats	GTTTTCTTAC	808	9	-	Nicotiana tabacum	defense and stress responsiveness
GhPHD62	CGTCA-motif	CGTCA	193	5	-	Hordeum vulgare	MeJA-responsiveness
GhPHD62	CGTCA-motif	CGTCA	685	5	-	Hordeum vulgare	MeJA-responsiveness
GhPHD62	ABRE	ACGTG	471	5	+	Arabidopsis thaliana	abscisic acid responsiveness
GhPHD62	ABRE	ACGTG	512	5	+	Arabidopsis thaliana	abscisic acid responsiveness
GhPHD62	ABRE	ACGTG	687	5	+	Arabidopsis thaliana	abscisic acid responsiveness
GhPHD62	TATC-box	TATCCCA	748	7	+	Oryza sativa	gibberellin-responsiveness
GhPHD62	G-box	CCACGTAA	469	8	-	Brassica napus	light responsiveness
GhPHD62	G-box	TACGTG	470	6	+	Arabidopsis thaliana	light responsiveness
GhPHD62	G-box	TACGTG	511	6	+	Arabidopsis thaliana	light responsiveness
GhPHD62	G-box	CACGTC	686	6	-	Zea mays	light responsiveness
GhPHD62	TC-rich repeats	ATTCTCTAAC	1417	9	-	Nicotiana tabacum	defense and stress responsiveness
GhPHD62	AuxRR-core	GGTCCAT	559	7	-	Nicotiana tabacum	auxin-responsive
GhPHD62	AuxRR-core	GGTCCAT	559	7	-	Nicotiana tabacum	auxin-responsive
GhPHD62	GARE-motif	TCTGTTG	521	7	-	Brassica oleracea	gibberellin-responsiveness
GhPHD62	MBS	CAACTG	189	6	-	Arabidopsis thaliana	drought-responsiveness
GhPHD62	ERE	ATTTCATA	892	8	+	Nicotiana glutinos	ethylene-responsiveness
GhPHD62	ERE	ATTTTAAA	1165	8	-	Nicotiana glutinos	ethylene-responsiveness
GhPHD62	ERE	ATTTTAAA	1459	8	+	Nicotiana glutinos	ethylene-responsiveness
GhPHD63	TATC-box	TATCCCA	344	7	-	Oryza sativa	gibberellin-responsiveness
GhPHD63	LTR	CCGAAA	771	6	+	Hordeum vulgare	low-temperature responsiveness
GhPHD63	TCA-element	CCATCTTTTT	205	9	-	Nicotiana tabacum	salicylic acid responsiveness
GhPHD64	P-box	CCTTTTG	614	7	-	Oryza sativa	gibberellin-responsiveness
GhPHD64	P-box	CCTTTTG	841	7	+	Oryza sativa	gibberellin-responsiveness
GhPHD64	ABRE	AACCCGG	353	7	-	Arabidopsis thaliana	abscisic acid responsiveness
GhPHD64	ERE	ATTTCATA	510	8	-	Nicotiana glutinos	ethylene-responsiveness
GhPHD64	ERE	ATTTTAAA	774	8	-	Nicotiana glutinos	ethylene-responsiveness
GhPHD64	ERE	ATTTTAAA	879	8	+	Nicotiana glutinos	ethylene-responsiveness
GhPHD64	ERE	ATTTTAAA	881	8	-	Nicotiana glutinos	ethylene-responsiveness
GhPHD64	ERE	ATTTTAAA	970	8	-	Nicotiana glutinos	ethylene-responsiveness
GhPHD64	LTR	CCGAAA	1328	6	+	Hordeum vulgare	low-temperature responsiveness
GhPHD65	GARE-motif	TCTGTTG	977	7	+	Brassica oleracea	gibberellin-responsiveness
GhPHD65	ERE	ATTTTAAA	186	8	+	Nicotiana glutinos	ethylene-responsiveness
GhPHD65	ABRE	ACGTG	473	5	-	Arabidopsis thaliana	abscisic acid responsiveness
GhPHD65	TGA-element	AACGAC	1378	6	+	Brassica oleracea	auxin-responsive
GhPHD65	CGTCA-motif	CGTCA	607	5	-	Hordeum vulgare	MeJA-responsiveness
GhPHD65	G-box	TAAACGTG	473	8	-	Brassica oleracea	light responsiveness
GhPHD65	G-box	TAACACGTAG	1224	9	+	Brassica oleracea	light responsiveness
GhPHD65	G-Box	CACGTT	473	6	+	Pisum sativum	light responsiveness
GhPHD65	TCA-element	TCAGAAGAGG	1270	9	-	Brassica oleracea	salicylic acid responsiveness
GhPHD66	G-Box	CACGTG	1481	6	-	Pisum sativum	light responsiveness
GhPHD66	ABRE	CACGTG	1481	6	-	Arabidopsis thaliana	abscisic acid responsiveness
GhPHD66	ABRE	ACGTG	1482	5	+	Arabidopsis thaliana	abscisic acid responsiveness
GhPHD66	TGA-element	AACGAC	642	6	+	Brassica oleracea	auxin-responsive
GhPHD66	CGTCA-motif	CGTCA	403	5	-	Hordeum vulgare	MeJA-responsiveness
GhPHD66	G-box	CACGTG	1481	6	-	Arabidopsis thaliana	light responsiveness
GhPHD66	TATC-box	TATCCCA	384	7	-	Oryza sativa	gibberellin-responsiveness
GhPHD66	MBS	CAACTG	758	6	+	Arabidopsis thaliana	drought-responsiveness
GhPHD66	ERE	ATTTTAAA	9	8	+	Nicotiana glutinos	ethylene-responsiveness
GhPHD66	ERE	ATTTTAAA	1016	8	+	Nicotiana glutinos	ethylene-responsiveness
GhPHD67	LTR	CCGAAA	561	6	-	Hordeum vulgare	low-temperature responsiveness
GhPHD67	ERE	ATTTTAAA	171	8	+	Nicotiana glutinos	ethylene-responsiveness
GhPHD67	ERE	ATTTTAAA	361	8	-	Nicotiana glutinos	ethylene-responsiveness
GhPHD67	GARE-motif	TCTGTTG	867	7	-	Brassica oleracea	gibberellin-responsiveness
GhPHD67	TCA-element	CCATCTTTTT	245	9	+	Nicotiana tabacum	salicylic acid responsiveness
GhPHD67	G-box	CACGAC	787	6	+	Zea mays	light responsiveness
GhPHD68	ERE	ATTTTAAA	238	8	+	Nicotiana glutinos	ethylene-responsiveness
GhPHD68	ERE	ATTTTAAA	331	8	-	Nicotiana glutinos	ethylene-responsiveness
GhPHD68	ERE	ATTTTAAA	469	8	-	Nicotiana glutinos	ethylene-responsiveness
GhPHD68	ERE	ATTTTAAA	660	8	+	Nicotiana glutinos	ethylene-responsiveness
GhPHD68	MBS	CAACTG	1149	6	-	Arabidopsis thaliana	drought-responsiveness
GhPHD68	TC-rich repeats	GTTTTCTTAC	399	9	-	Nicotiana tabacum	defense and stress responsiveness
GhPHD68	TC-rich repeats	GTTTTCTTAC	909	9	-	Nicotiana tabacum	defense and stress responsiveness
GhPHD68	G-box	CACGTC	831	6	-	Zea mays	light responsiveness
GhPHD68	ABRE	ACGTG	832	5	+	Arabidopsis thaliana	abscisic acid responsiveness
GhPHD69	ERE	ATTTCATA	141	8	+	Nicotiana glutinos	ethylene-responsiveness
GhPHD69	ERE	ATTTTAAA	742	8	+	Nicotiana glutinos	ethylene-responsiveness
GhPHD69	ERE	ATTTTAAA	832	8	-	Nicotiana glutinos	ethylene-responsiveness
GhPHD69	ERE	ATTTTAAA	931	8	+	Nicotiana glutinos	ethylene-responsiveness
GhPHD69	ERE	ATTTTAAA	976	8	-	Nicotiana glutinos	ethylene-responsiveness
GhPHD69	ERE	ATTTTAAA	1253	8	-	Nicotiana glutinos	ethylene-responsiveness
GhPHD69	TGA-element	AACGAC	68	6	-	Brassica oleracea	auxin-responsive
GhPHD69	ABRE	ACGTG	91	5	+	Arabidopsis thaliana	abscisic acid responsiveness
GhPHD69	ABRE	ACGTG	1420	5	+	Arabidopsis thaliana	abscisic acid responsiveness
GhPHD69	G-box	CACGTC	1419	6	-	Zea mays	light responsiveness
GhPHD69	TC-rich repeats	GTTTTCTTAC	904	9	-	Nicotiana tabacum	defense and stress responsiveness
GhPHD69	G-Box	CACGTT	90	6	-	Pisum sativum	light responsiveness
GhPHD70	TCA-element	CCATCTTTTT	1477	9	+	Nicotiana tabacum	salicylic acid responsiveness
GhPHD70	ABRE	ACGTG	472	5	+	Arabidopsis thaliana	abscisic acid responsiveness
GhPHD70	ABRE	GCCGCGTGGC	497	9	-	Oryza sativa	abscisic acid responsiveness
GhPHD70	CGTCA-motif	CGTCA	1411	5	+	Hordeum vulgare	MeJA-responsiveness
GhPHD70	G-box	TACGTG	471	6	+	Arabidopsis thaliana	light responsiveness
GhPHD70	ERE	ATTTCATA	672	8	-	Nicotiana glutinos	ethylene-responsiveness
GhPHD71	ERE	ATTTTAAA	436	8	-	Nicotiana glutinos	ethylene-responsiveness
GhPHD71	ERE	ATTTTAAA	848	8	+	Nicotiana glutinos	ethylene-responsiveness
GhPHD71	TC-rich repeats	GTTTTCTTAC	979	9	-	Nicotiana tabacum	defense and stress responsiveness
GhPHD71	P-box	CCTTTTG	1473	7	-	Oryza sativa	gibberellin-responsiveness
GhPHD71	G-Box	CACGTT	1277	6	-	Pisum sativum	light responsiveness
GhPHD71	G-box	TACGTG	273	6	+	Arabidopsis thaliana	light responsiveness
GhPHD71	TATC-box	TATCCCA	1440	7	-	Oryza sativa	gibberellin-responsiveness
GhPHD71	ABRE	GACACGTACGT	270	10	-	Oryza sativa	abscisic acid responsiveness
GhPHD71	ABRE	ACGTG	274	5	+	Arabidopsis thaliana	abscisic acid responsiveness
GhPHD71	ABRE	ACGTG	1278	5	+	Arabidopsis thaliana	abscisic acid responsiveness
GhPHD72	P-box	CCTTTTG	1340	7	+	Oryza sativa	gibberellin-responsiveness
GhPHD72	ERE	ATTTTAAA	128	8	+	Nicotiana glutinos	ethylene-responsiveness
GhPHD72	ERE	ATTTCATA	1298	8	-	Nicotiana glutinos	ethylene-responsiveness
GhPHD73	CGTCA-motif	CGTCA	726	5	-	Hordeum vulgare	MeJA-responsiveness
GhPHD73	ABRE	ACGTG	438	5	+	Arabidopsis thaliana	abscisic acid responsiveness
GhPHD73	G-Box	CACGTT	437	6	-	Pisum sativum	light responsiveness
GhPHD74	MBS	CAACTG	24	6	-	Arabidopsis thaliana	drought-responsiveness
GhPHD74	MBS	CAACTG	1023	6	-	Arabidopsis thaliana	drought-responsiveness
GhPHD74	G-box	CACGAC	290	6	-	Zea mays	light responsiveness
GhPHD74	CGTCA-motif	CGTCA	1301	5	-	Hordeum vulgare	MeJA-responsiveness
GhPHD74	P-box	CCTTTTG	86	7	+	Oryza sativa	gibberellin-responsiveness
GhPHD75	G-box	TACGTG	216	6	+	Arabidopsis thaliana	light responsiveness
GhPHD75	ABRE	ACGTG	69	5	-	Arabidopsis thaliana	abscisic acid responsiveness
GhPHD75	ABRE	ACGTG	217	5	+	Arabidopsis thaliana	abscisic acid responsiveness
GhPHD75	ABRE	ACGTG	1425	5	+	Arabidopsis thaliana	abscisic acid responsiveness
GhPHD75	G-Box	CACGTT	69	6	+	Pisum sativum	light responsiveness
GhPHD75	G-Box	CACGTT	1424	6	-	Pisum sativum	light responsiveness
GhPHD75	ERE	ATTTTAAA	126	8	+	Nicotiana glutinos	ethylene-responsiveness
GhPHD75	ERE	ATTTTAAA	821	8	+	Nicotiana glutinos	ethylene-responsiveness
GhPHD75	LTR	CCGAAA	396	6	-	Hordeum vulgare	low-temperature responsiveness
GhPHD75	LTR	CCGAAA	404	6	-	Hordeum vulgare	low-temperature responsiveness
GhPHD75	circadian	CAAAGATATC	1457	9	+	Lycopersicon esculentum	circadian control
GhPHD76	ERE	ATTTTAAA	1276	8	-	Nicotiana glutinos	ethylene-responsiveness
GhPHD76	LTR	CCGAAA	819	6	+	Hordeum vulgare	low-temperature responsiveness
GhPHD76	GARE-motif	TCTGTTG	129	7	+	Brassica oleracea	gibberellin-responsiveness
GhPHD76	CGTCA-motif	CGTCA	395	5	+	Hordeum vulgare	MeJA-responsiveness
GhPHD77	LTR	CCGAAA	124	6	-	Hordeum vulgare	low-temperature responsiveness
GhPHD77	LTR	CCGAAA	166	6	-	Hordeum vulgare	low-temperature responsiveness
GhPHD77	ERE	ATTTTAAA	13	8	-	Nicotiana glutinos	ethylene-responsiveness
GhPHD78	GARE-motif	TCTGTTG	647	7	+	Brassica oleracea	gibberellin-responsiveness
GhPHD78	ERE	ATTTTAAA	414	8	-	Nicotiana glutinos	ethylene-responsiveness
GhPHD78	ERE	ATTTTAAA	476	8	+	Nicotiana glutinos	ethylene-responsiveness
GhPHD78	ERE	ATTTTAAA	493	8	+	Nicotiana glutinos	ethylene-responsiveness
GhPHD78	ERE	ATTTTAAA	495	8	-	Nicotiana glutinos	ethylene-responsiveness
GhPHD78	ERE	ATTTTAAA	546	8	+	Nicotiana glutinos	ethylene-responsiveness
GhPHD78	ERE	ATTTTAAA	548	8	-	Nicotiana glutinos	ethylene-responsiveness
GhPHD78	ERE	ATTTTAAA	1074	8	+	Nicotiana glutinos	ethylene-responsiveness
GhPHD78	ERE	ATTTTAAA	1187	8	+	Nicotiana glutinos	ethylene-responsiveness
GhPHD78	circadian	CAAAGATATC	1027	9	+	Lycopersicon esculentum	circadian control
GhPHD78	CGTCA-motif	CGTCA	1271	5	+	Hordeum vulgare	MeJA-responsiveness
GhPHD78	P-box	CCTTTTG	826	7	+	Oryza sativa	gibberellin-responsiveness
GhPHD79	TGA-element	AACGAC	33	6	-	Brassica oleracea	auxin-responsive
GhPHD79	CGTCA-motif	CGTCA	188	5	-	Hordeum vulgare	MeJA-responsiveness
GhPHD79	CGTCA-motif	CGTCA	1169	5	+	Hordeum vulgare	MeJA-responsiveness
GhPHD79	MBS	CAACTG	1102	6	-	Arabidopsis thaliana	drought-responsiveness
GhPHD79	MBS	CAACTG	1108	6	-	Arabidopsis thaliana	drought-responsiveness
GhPHD79	MBS	CAACTG	1357	6	-	Arabidopsis thaliana	drought-responsiveness
GhPHD79	MBS	CAACTG	1397	6	-	Arabidopsis thaliana	drought-responsiveness
GhPHD80	TC-rich repeats	GTTTTCTTAC	1134	9	-	Nicotiana tabacum	defense and stress responsiveness
GhPHD80	P-box	CCTTTTG	235	7	-	Oryza sativa	gibberellin-responsiveness
GhPHD80	ABRE	ACGTG	320	5	+	Arabidopsis thaliana	abscisic acid responsiveness
GhPHD80	ABRE	ACGTG	350	5	+	Arabidopsis thaliana	abscisic acid responsiveness
GhPHD80	ABRE	ACGTG	373	5	+	Arabidopsis thaliana	abscisic acid responsiveness
GhPHD80	TGA-element	AACGAC	1090	6	-	Brassica oleracea	auxin-responsive
GhPHD80	G-box	TAACACGTAG	210	9	-	Brassica oleracea	light responsiveness
GhPHD80	G-box	CACGTC	319	6	-	Zea mays	light responsiveness
GhPHD80	G-box	TAACACGTAG	348	9	-	Brassica oleracea	light responsiveness
GhPHD80	G-box	TACGTG	349	6	+	Arabidopsis thaliana	light responsiveness
GhPHD80	G-box	TACGTG	372	6	+	Arabidopsis thaliana	light responsiveness
GhPHD80	ERE	ATTTTAAA	984	8	-	Nicotiana glutinos	ethylene-responsiveness
GhPHD80	ERE	ATTTTAAA	1322	8	-	Nicotiana glutinos	ethylene-responsiveness
GhPHD81	CGTCA-motif	CGTCA	201	5	+	Hordeum vulgare	MeJA-responsiveness
GhPHD81	CGTCA-motif	CGTCA	487	5	-	Hordeum vulgare	MeJA-responsiveness
GhPHD81	TATC-box	TATCCCA	1095	7	+	Oryza sativa	gibberellin-responsiveness
GhPHD81	MBS	CAACTG	1074	6	+	Arabidopsis thaliana	drought-responsiveness
GhPHD81	ERE	ATTTCATA	54	8	+	Nicotiana glutinos	ethylene-responsiveness
GhPHD81	LTR	CCGAAA	265	6	-	Hordeum vulgare	low-temperature responsiveness
GhPHD81	LTR	CCGAAA	1204	6	-	Hordeum vulgare	low-temperature responsiveness
GhPHD82	ERE	ATTTTAAA	848	8	+	Nicotiana glutinos	ethylene-responsiveness
GhPHD82	ERE	ATTTTAAA	1281	8	+	Nicotiana glutinos	ethylene-responsiveness
GhPHD82	ERE	ATTTTAAA	1283	8	-	Nicotiana glutinos	ethylene-responsiveness
GhPHD82	CGTCA-motif	CGTCA	128	5	-	Hordeum vulgare	MeJA-responsiveness
GhPHD82	TC-rich repeats	ATTCTCTAAC	194	9	-	Nicotiana tabacum	defense and stress responsiveness
GhPHD82	P-box	CCTTTTG	287	7	-	Oryza sativa	gibberellin-responsiveness
GhPHD82	P-box	CCTTTTG	626	7	+	Oryza sativa	gibberellin-responsiveness
GhPHD82	P-box	CCTTTTG	1421	7	+	Oryza sativa	gibberellin-responsiveness
GhPHD83	G-Box	CACGTG	870	6	-	Pisum sativum	light responsiveness
GhPHD83	CARE	CAACTCAC	873	8	-	Oryza sativa	gibberellin-responsiveness
GhPHD83	G-box	CACGTG	870	6	-	Arabidopsis thaliana	light responsiveness
GhPHD83	CGTCA-motif	CGTCA	1356	5	-	Hordeum vulgare	MeJA-responsiveness
GhPHD83	ABRE	CACGTG	870	6	-	Arabidopsis thaliana	abscisic acid responsiveness
GhPHD83	ABRE	ACGTG	871	5	+	Arabidopsis thaliana	abscisic acid responsiveness
GhPHD83	circadian	CAAAGATATC	233	9	+	Lycopersicon esculentum	circadian control
GhPHD83	circadian	CAAAGATATC	406	9	-	Lycopersicon esculentum	circadian control
GhPHD83	LTR	CCGAAA	941	6	+	Hordeum vulgare	low-temperature responsiveness
GhPHD84	ABRE	ACGTG	1087	5	-	Arabidopsis thaliana	abscisic acid responsiveness
GhPHD84	CGTCA-motif	CGTCA	219	5	-	Hordeum vulgare	MeJA-responsiveness
GhPHD84	G-box	CCACGTAA	1086	8	+	Brassica napus	light responsiveness
GhPHD84	G-box	TACGTG	1087	6	-	Arabidopsis thaliana	light responsiveness
GhPHD84	ERE	ATTTTAAA	1249	8	-	Nicotiana glutinos	ethylene-responsiveness
GhPHD84	LTR	CCGAAA	950	6	-	Hordeum vulgare	low-temperature responsiveness
GhPHD85	ERE	ATTTTAAA	674	8	+	Nicotiana glutinos	ethylene-responsiveness
GhPHD85	ERE	ATTTTAAA	676	8	-	Nicotiana glutinos	ethylene-responsiveness
GhPHD85	ERE	ATTTTAAA	771	8	-	Nicotiana glutinos	ethylene-responsiveness
GhPHD85	ERE	ATTTCATA	1006	8	+	Nicotiana glutinos	ethylene-responsiveness
GhPHD85	ERE	ATTTTAAA	1284	8	-	Nicotiana glutinos	ethylene-responsiveness
GhPHD85	LTR	CCGAAA	1324	6	-	Hordeum vulgare	low-temperature responsiveness
GhPHD85	G-box	CACGAC	850	6	+	Zea mays	light responsiveness
GhPHD85	G-box	TACGTG	856	6	-	Arabidopsis thaliana	light responsiveness
GhPHD85	ABRE	ACGTG	856	5	-	Arabidopsis thaliana	abscisic acid responsiveness
GhPHD85	CGTCA-motif	CGTCA	1357	5	-	Hordeum vulgare	MeJA-responsiveness
GhPHD85	TCA-element	CCATCTTTTT	776	9	-	Nicotiana tabacum	salicylic acid responsiveness
GhPHD85	TCA-element	CCATCTTTTT	1405	9	+	Nicotiana tabacum	salicylic acid responsiveness
GhPHD85	P-box	CCTTTTG	1473	7	+	Oryza sativa	gibberellin-responsiveness
GhPHD86	GARE-motif	TCTGTTG	1128	7	-	Brassica oleracea	gibberellin-responsiveness
GhPHD86	TATC-box	TATCCCA	436	7	-	Oryza sativa	gibberellin-responsiveness
GhPHD86	ERE	ATTTTAAA	132	8	+	Nicotiana glutinos	ethylene-responsiveness
GhPHD86	ERE	ATTTTAAA	471	8	-	Nicotiana glutinos	ethylene-responsiveness
GhPHD86	ERE	ATTTTAAA	821	8	+	Nicotiana glutinos	ethylene-responsiveness
GhPHD86	ERE	ATTTTAAA	1187	8	+	Nicotiana glutinos	ethylene-responsiveness
GhPHD86	TCA-element	CCATCTTTTT	178	9	+	Nicotiana tabacum	salicylic acid responsiveness
GhPHD86	TCA-element	TCAGAAGAGG	353	9	-	Brassica oleracea	salicylic acid responsiveness
GhPHD87	TC-rich repeats	GTTTTCTTAC	1475	9	+	Nicotiana tabacum	defense and stress responsiveness
GhPHD87	P-box	CCTTTTG	581	7	-	Oryza sativa	gibberellin-responsiveness
GhPHD87	P-box	CCTTTTG	952	7	-	Oryza sativa	gibberellin-responsiveness
GhPHD87	G-box	CACGAC	1354	6	+	Zea mays	light responsiveness
GhPHD88	TC-rich repeats	ATTCTCTAAC	955	10	-	Nicotiana tabacum	defense and stress responsiveness
GhPHD88	G-box	TACGTG	1109	6	-	Arabidopsis thaliana	light responsiveness
GhPHD88	G-box	CACGTC	1413	6	-	Zea mays	light responsiveness
GhPHD88	TGA-element	AACGAC	157	6	-	Brassica oleracea	auxin-responsive
GhPHD88	ABRE	TACGTGTC	1107	8	-	Oryza sativa	abscisic acid responsiveness
GhPHD88	ABRE	ACGTG	1109	5	-	Arabidopsis thaliana	abscisic acid responsiveness
GhPHD88	ABRE	ACGTG	1414	5	+	Arabidopsis thaliana	abscisic acid responsiveness
GhPHD88	CGTCA-motif	CGTCA	393	5	+	Hordeum vulgare	MeJA-responsiveness
GhPHD88	CGTCA-motif	CGTCA	1074	5	-	Hordeum vulgare	MeJA-responsiveness
GhPHD88	CGTCA-motif	CGTCA	1412	5	-	Hordeum vulgare	MeJA-responsiveness
GhPHD88	LTR	CCGAAA	37	6	-	Hordeum vulgare	low-temperature responsiveness
GhPHD88	LTR	CCGAAA	294	6	+	Hordeum vulgare	low-temperature responsiveness
GhPHD88	ERE	ATTTTAAA	828	8	+	Nicotiana glutinos	ethylene-responsiveness
GhPHD89	G-Box	CACGTT	1093	6	+	Pisum sativum	light responsiveness
GhPHD89	TCA-element	CCATCTTTTT	1213	10	+	Nicotiana tabacum	salicylic acid responsiveness
GhPHD89	TCA-element	TCAGAAGAGG	1453	9	-	Brassica oleracea	salicylic acid responsiveness
GhPHD89	G-box	TACGTG	366	6	-	Arabidopsis thaliana	light responsiveness
GhPHD89	G-box	CACGTC	1040	6	-	Zea mays	light responsiveness
GhPHD89	ABRE	ACGTG	366	5	-	Arabidopsis thaliana	abscisic acid responsiveness
GhPHD89	ABRE	ACGTG	1041	5	+	Arabidopsis thaliana	abscisic acid responsiveness
GhPHD89	ABRE	ACGTG	1093	5	-	Arabidopsis thaliana	abscisic acid responsiveness
GhPHD89	CGTCA-motif	CGTCA	1039	5	-	Hordeum vulgare	MeJA-responsiveness
GhPHD89	CGTCA-motif	CGTCA	1232	5	+	Hordeum vulgare	MeJA-responsiveness
GhPHD89	ERE	ATTTTAAA	139	8	-	Nicotiana glutinos	ethylene-responsiveness
GhPHD89	ERE	ATTTTAAA	329	8	+	Nicotiana glutinos	ethylene-responsiveness
GhPHD89	ERE	ATTTTAAA	1310	8	+	Nicotiana glutinos	ethylene-responsiveness
GhPHD90	CGTCA-motif	CGTCA	301	5	+	Hordeum vulgare	MeJA-responsiveness
GhPHD90	TATC-box	TATCCCA	642	7	-	Oryza sativa	gibberellin-responsiveness
GhPHD90	TATC-box	TATCCCA	1006	7	-	Oryza sativa	gibberellin-responsiveness
GhPHD90	LTR	CCGAAA	244	6	-	Hordeum vulgare	low-temperature responsiveness
GhPHD90	ERE	ATTTCATA	415	8	+	Nicotiana glutinos	ethylene-responsiveness
GhPHD91	TGA-element	AACGAC	632	6	-	Brassica oleracea	auxin-responsive
GhPHD91	MBS	CAACTG	301	6	-	Arabidopsis thaliana	drought-responsiveness
GhPHD91	LTR	CCGAAA	851	6	-	Hordeum vulgare	low-temperature responsiveness
GhPHD91	ERE	ATTTTAAA	1277	8	-	Nicotiana glutinos	ethylene-responsiveness
GhPHD91	ERE	ATTTTAAA	1361	8	+	Nicotiana glutinos	ethylene-responsiveness
GhPHD91	ERE	ATTTTAAA	1391	8	+	Nicotiana glutinos	ethylene-responsiveness
GhPHD92	G-box	tgACACGTGGCA	1273	11	-	Lycopersicon esculentum	light responsiveness
GhPHD92	G-box	GCCACGTGGA	1274	9	-	Arabidopsis thaliana	light responsiveness
GhPHD92	G-box	CACGTG	1276	6	-	Arabidopsis thaliana	light responsiveness
GhPHD92	CGTCA-motif	CGTCA	330	5	+	Hordeum vulgare	MeJA-responsiveness
GhPHD92	CGTCA-motif	CGTCA	921	5	-	Hordeum vulgare	MeJA-responsiveness
GhPHD92	CGTCA-motif	CGTCA	1135	5	-	Hordeum vulgare	MeJA-responsiveness
GhPHD92	ABRE	GACACGTGGC	1274	9	-	Triticum aestivum	abscisic acid responsiveness
GhPHD92	ABRE	CACGTG	1276	6	-	Arabidopsis thaliana	abscisic acid responsiveness
GhPHD92	ABRE	ACGTG	1277	5	+	Arabidopsis thaliana	abscisic acid responsiveness
GhPHD92	G-Box	CACGTG	1276	6	-	Pisum sativum	light responsiveness
GhPHD92	TCA-element	CCATCTTTTT	1416	9	+	Nicotiana tabacum	salicylic acid responsiveness
GhPHD92	ERE	ATTTTAAA	97	8	-	Nicotiana glutinos	ethylene-responsiveness
GhPHD92	ERE	ATTTTAAA	706	8	+	Nicotiana glutinos	ethylene-responsiveness
GhPHD93	MBS	CAACTG	1190	6	-	Arabidopsis thaliana	drought-responsiveness
GhPHD93	ERE	ATTTTAAA	432	8	+	Nicotiana glutinos	ethylene-responsiveness
GhPHD93	ERE	ATTTTAAA	759	8	-	Nicotiana glutinos	ethylene-responsiveness
GhPHD93	ERE	ATTTTAAA	1007	8	-	Nicotiana glutinos	ethylene-responsiveness
GhPHD93	TCA-element	CCATCTTTTT	129	9	+	Nicotiana tabacum	salicylic acid responsiveness
GhPHD93	TCA-element	CCATCTTTTT	605	9	-	Nicotiana tabacum	salicylic acid responsiveness
GhPHD93	G-Box	CACGTT	74	6	+	Pisum sativum	light responsiveness
GhPHD93	G-Box	CACGTT	361	6	+	Pisum sativum	light responsiveness
GhPHD93	G-Box	CACGTT	1324	6	-	Pisum sativum	light responsiveness
GhPHD93	ABRE	ACGTG	74	5	-	Arabidopsis thaliana	abscisic acid responsiveness
GhPHD93	ABRE	ACGTG	361	5	-	Arabidopsis thaliana	abscisic acid responsiveness
GhPHD93	ABRE	ACGTG	1325	5	+	Arabidopsis thaliana	abscisic acid responsiveness
GhPHD94	ERE	ATTTTAAA	640	8	-	Nicotiana glutinos	ethylene-responsiveness
GhPHD94	ERE	ATTTTAAA	656	8	-	Nicotiana glutinos	ethylene-responsiveness
GhPHD94	ERE	ATTTTAAA	677	8	-	Nicotiana glutinos	ethylene-responsiveness
GhPHD94	ERE	ATTTTAAA	1016	8	-	Nicotiana glutinos	ethylene-responsiveness
GhPHD94	TCA-element	CCATCTTTTT	79	9	-	Nicotiana tabacum	salicylic acid responsiveness
GhPHD95	G-box	CCACGTAA	1356	8	+	Brassica napus	light responsiveness
GhPHD95	G-box	TACGTG	1357	6	-	Arabidopsis thaliana	light responsiveness
GhPHD95	G-box	CACGTC	1396	6	-	Zea mays	light responsiveness
GhPHD95	CGTCA-motif	CGTCA	1395	5	-	Hordeum vulgare	MeJA-responsiveness
GhPHD95	ABRE	ACGTG	1219	5	-	Arabidopsis thaliana	abscisic acid responsiveness
GhPHD95	ABRE	ACGTG	1357	5	-	Arabidopsis thaliana	abscisic acid responsiveness
GhPHD95	ABRE	ACGTG	1397	5	+	Arabidopsis thaliana	abscisic acid responsiveness
GhPHD95	TGA-element	AACGAC	1417	6	-	Brassica oleracea	auxin-responsive
GhPHD95	TGA-element	AACGAC	1472	6	+	Brassica oleracea	auxin-responsive
GhPHD95	G-Box	CACGTT	1219	6	+	Pisum sativum	light responsiveness
GhPHD95	TC-rich repeats	GTTTTCTTAC	345	9	-	Nicotiana tabacum	defense and stress responsiveness
GhPHD95	GARE-motif	TCTGTTG	93	7	-	Brassica oleracea	gibberellin-responsiveness
GhPHD95	ERE	ATTTTAAA	385	8	-	Nicotiana glutinos	ethylene-responsiveness
GhPHD95	ERE	ATTTCATA	663	8	-	Nicotiana glutinos	ethylene-responsiveness
GhPHD95	ERE	ATTTTAAA	825	8	+	Nicotiana glutinos	ethylene-responsiveness
GhPHD96	ABRE	ACGTG	1358	5	+	Arabidopsis thaliana	abscisic acid responsiveness
GhPHD96	ABRE	ACGTG	1378	5	-	Arabidopsis thaliana	abscisic acid responsiveness
GhPHD96	TGA-element	AACGAC	1186	6	-	Brassica oleracea	auxin-responsive
GhPHD96	CGTCA-motif	CGTCA	1356	5	-	Hordeum vulgare	MeJA-responsiveness
GhPHD96	CGTCA-motif	CGTCA	1380	5	+	Hordeum vulgare	MeJA-responsiveness
GhPHD96	G-box	CACGTC	1357	6	-	Zea mays	light responsiveness
GhPHD96	G-box	CACGTC	1378	6	+	Zea mays	light responsiveness
GhPHD96	TATC-box	TATCCCA	701	7	+	Oryza sativa	gibberellin-responsiveness
GhPHD96	GARE-motif	TCTGTTG	131	7	-	Brassica oleracea	gibberellin-responsiveness
GhPHD97	TCA-element	CCATCTTTTT	412	9	+	Nicotiana tabacum	salicylic acid responsiveness
GhPHD97	G-Box	CACGTT	853	6	-	Pisum sativum	light responsiveness
GhPHD97	ABRE	ACGTG	854	5	+	Arabidopsis thaliana	abscisic acid responsiveness
GhPHD97	CGTCA-motif	CGTCA	290	5	+	Hordeum vulgare	MeJA-responsiveness
GhPHD97	CGTCA-motif	CGTCA	587	5	-	Hordeum vulgare	MeJA-responsiveness
GhPHD97	CGTCA-motif	CGTCA	1342	5	-	Hordeum vulgare	MeJA-responsiveness
GhPHD98	P-box	CCTTTTG	1120	7	+	Oryza sativa	gibberellin-responsiveness
GhPHD98	P-box	CCTTTTG	1384	7	-	Oryza sativa	gibberellin-responsiveness
GhPHD98	G-box	GCCACGTGGA	976	9	-	Arabidopsis thaliana	light responsiveness
GhPHD98	TATC-box	TATCCCA	1298	7	+	Oryza sativa	gibberellin-responsiveness
GhPHD98	TGA-element	AACGAC	386	6	+	Brassica oleracea	auxin-responsive
GhPHD98	ERE	ATTTTAAA	625	8	-	Nicotiana glutinos	ethylene-responsiveness
GhPHD98	ERE	ATTTTAAA	1061	8	+	Nicotiana glutinos	ethylene-responsiveness
GhPHD98	ERE	ATTTTAAA	1063	8	-	Nicotiana glutinos	ethylene-responsiveness
GhPHD98	ERE	ATTTTAAA	1245	8	+	Nicotiana glutinos	ethylene-responsiveness
GhPHD98	MBS	CAACTG	709	6	-	Arabidopsis thaliana	drought-responsiveness
GhPHD98	MBS	CAACTG	985	6	+	Arabidopsis thaliana	drought-responsiveness
GhPHD99	ERE	ATTTTAAA	1335	8	-	Nicotiana glutinos	ethylene-responsiveness
GhPHD99	MBS	CAACTG	499	6	+	Arabidopsis thaliana	drought-responsiveness
GhPHD99	CGTCA-motif	CGTCA	935	5	+	Hordeum vulgare	MeJA-responsiveness
GhPHD99	CGTCA-motif	CGTCA	1125	5	+	Hordeum vulgare	MeJA-responsiveness
GhPHD99	TC-rich repeats	GTTTTCTTAC	936	9	-	Nicotiana tabacum	defense and stress responsiveness
GhPHD99	TC-rich repeats	GTTTTCTTAC	1291	9	-	Nicotiana tabacum	defense and stress responsiveness
GhPHD100	ABRE	ACGTG	1441	5	-	Arabidopsis thaliana	abscisic acid responsiveness
GhPHD100	CGTCA-motif	CGTCA	66	5	+	Hordeum vulgare	MeJA-responsiveness
GhPHD100	G-box	TACGTG	1441	6	-	Arabidopsis thaliana	light responsiveness
GhPHD100	TCA-element	CCATCTTTTT	699	10	+	Nicotiana tabacum	salicylic acid responsiveness
GhPHD100	ERE	ATTTTAAA	537	8	+	Nicotiana glutinos	ethylene-responsiveness
GhPHD101	P-box	CCTTTTG	476	7	-	Oryza sativa	gibberellin-responsiveness
GhPHD101	G-Box	CACGTT	1125	6	-	Pisum sativum	light responsiveness
GhPHD101	CGTCA-motif	CGTCA	16	5	-	Hordeum vulgare	MeJA-responsiveness
GhPHD101	CGTCA-motif	CGTCA	92	5	-	Hordeum vulgare	MeJA-responsiveness
GhPHD101	CGTCA-motif	CGTCA	269	5	-	Hordeum vulgare	MeJA-responsiveness
GhPHD101	ABRE	ACGTG	1126	5	+	Arabidopsis thaliana	abscisic acid responsiveness
GhPHD101	TGA-element	AACGAC	783	6	+	Brassica oleracea	auxin-responsive
GhPHD101	TGA-element	AACGAC	849	6	-	Brassica oleracea	auxin-responsive
GhPHD101	MBS	CAACTG	44	6	+	Arabidopsis thaliana	drought-responsiveness
GhPHD101	3-AF1 binding site	TAAGAGAGGAA	247	10	-	Solanum tuberosum	light responsiveness
GhPHD101	GARE-motif	TCTGTTG	345	7	+	Brassica oleracea	gibberellin-responsiveness
GhPHD101	GARE-motif	TCTGTTG	534	7	+	Brassica oleracea	gibberellin-responsiveness
GhPHD102	TCA-element	TCAGAAGAGG	1403	9	-	Brassica oleracea	salicylic acid responsiveness
GhPHD102	CGTCA-motif	CGTCA	324	5	+	Hordeum vulgare	MeJA-responsiveness
GhPHD102	ERE	ATTTTAAA	234	8	+	Nicotiana glutinos	ethylene-responsiveness
GhPHD102	ERE	ATTTTAAA	236	8	-	Nicotiana glutinos	ethylene-responsiveness
GhPHD102	ERE	ATTTCATA	427	8	-	Nicotiana glutinos	ethylene-responsiveness
GhPHD102	ERE	ATTTTAAA	746	8	-	Nicotiana glutinos	ethylene-responsiveness
GhPHD102	ERE	ATTTTAAA	900	8	+	Nicotiana glutinos	ethylene-responsiveness
GhPHD103	GARE-motif	TCTGTTG	1160	7	+	Brassica oleracea	gibberellin-responsiveness
GhPHD103	circadian	CAAAGATATC	617	9	+	Lycopersicon esculentum	circadian control
GhPHD103	ERE	ATTTTAAA	110	8	+	Nicotiana glutinos	ethylene-responsiveness
GhPHD103	ERE	ATTTTAAA	112	8	-	Nicotiana glutinos	ethylene-responsiveness
GhPHD103	ERE	ATTTCATA	889	8	+	Nicotiana glutinos	ethylene-responsiveness
GhPHD103	ERE	ATTTTAAA	1326	8	+	Nicotiana glutinos	ethylene-responsiveness
GhPHD103	ERE	ATTTTAAA	1328	8	-	Nicotiana glutinos	ethylene-responsiveness
GhPHD103	MBS	CAACTG	665	6	-	Arabidopsis thaliana	drought-responsiveness
GhPHD103	MBS	CAACTG	809	6	-	Arabidopsis thaliana	drought-responsiveness
GhPHD103	G-box	CACGTC	485	6	+	Zea mays	light responsiveness
GhPHD103	CGTCA-motif	CGTCA	487	5	+	Hordeum vulgare	MeJA-responsiveness
GhPHD103	ABRE	ACGTG	485	5	-	Arabidopsis thaliana	abscisic acid responsiveness
GhPHD103	ABRE	AACCCGG	769	7	+	Arabidopsis thaliana	abscisic acid responsiveness
GhPHD104	G-box	TAAACGTG	510	8	-	Brassica oleracea	light responsiveness
GhPHD104	G-box	TACGTG	1385	6	-	Arabidopsis thaliana	light responsiveness
GhPHD104	ABRE	ACGTG	510	5	-	Arabidopsis thaliana	abscisic acid responsiveness
GhPHD104	ABRE	ACGTG	1187	5	-	Arabidopsis thaliana	abscisic acid responsiveness
GhPHD104	ABRE	ACGTG	1385	5	-	Arabidopsis thaliana	abscisic acid responsiveness
GhPHD104	G-Box	CACGTT	510	6	+	Pisum sativum	light responsiveness
GhPHD104	G-Box	CACGTT	1187	6	+	Pisum sativum	light responsiveness
GhPHD104	LTR	CCGAAA	863	6	+	Hordeum vulgare	low-temperature responsiveness
GhPHD104	LTR	CCGAAA	1153	6	+	Hordeum vulgare	low-temperature responsiveness
GhPHD104	ERE	ATTTTAAA	51	8	-	Nicotiana glutinos	ethylene-responsiveness
GhPHD105	TGA-element	AACGAC	819	6	-	Brassica oleracea	auxin-responsive
GhPHD105	ABRE	TACGTGTC	1192	8	+	Oryza sativa	abscisic acid responsiveness
GhPHD105	ABRE	ACGTG	1193	5	+	Arabidopsis thaliana	abscisic acid responsiveness
GhPHD105	G-box	TACGTG	1192	6	+	Arabidopsis thaliana	light responsiveness
GhPHD105	CARE	CAACTCCC	592	8	-	Oryza sativa	gibberellin-responsiveness
GhPHD105	P-box	CCTTTTG	342	7	-	Oryza sativa	gibberellin-responsiveness
GhPHD105	GARE-motif	TCTGTTG	940	7	+	Brassica oleracea	gibberellin-responsiveness
GhPHD105	LTR	CCGAAA	841	6	-	Hordeum vulgare	low-temperature responsiveness
GhPHD105	ERE	ATTTTAAA	1000	8	+	Nicotiana glutinos	ethylene-responsiveness
GhPHD106	TCA-element	CCATCTTTTT	219	9	-	Nicotiana tabacum	salicylic acid responsiveness
GhPHD106	GARE-motif	TCTGTTG	610	7	+	Brassica oleracea	gibberellin-responsiveness
GhPHD106	ERE	ATTTTAAA	205	8	+	Nicotiana glutinos	ethylene-responsiveness
GhPHD106	ERE	ATTTTAAA	676	8	-	Nicotiana glutinos	ethylene-responsiveness
GhPHD106	ERE	ATTTTAAA	1152	8	-	Nicotiana glutinos	ethylene-responsiveness
GhPHD106	MBS	CAACTG	945	6	-	Arabidopsis thaliana	drought-responsiveness
GhPHD107	ERE	ATTTTAAA	249	8	+	Nicotiana glutinos	ethylene-responsiveness
GhPHD107	ERE	ATTTTAAA	363	8	-	Nicotiana glutinos	ethylene-responsiveness
GhPHD107	ERE	ATTTTAAA	369	8	+	Nicotiana glutinos	ethylene-responsiveness
GhPHD107	ERE	ATTTTAAA	402	8	+	Nicotiana glutinos	ethylene-responsiveness
GhPHD107	ERE	ATTTTAAA	810	8	+	Nicotiana glutinos	ethylene-responsiveness
GhPHD107	ABRE	ACGTG	925	5	-	Arabidopsis thaliana	abscisic acid responsiveness
GhPHD107	ABRE	ACGTG	1127	5	-	Arabidopsis thaliana	abscisic acid responsiveness
GhPHD107	TGA-element	AACGAC	1447	6	-	Brassica oleracea	auxin-responsive
GhPHD107	G-box	TACGTG	1127	6	-	Arabidopsis thaliana	light responsiveness
GhPHD107	G-Box	CACGTT	925	6	+	Pisum sativum	light responsiveness
GhPHD107	P-box	CCTTTTG	102	7	+	Oryza sativa	gibberellin-responsiveness
GhPHD108	ERE	ATTTTAAA	441	8	-	Nicotiana glutinos	ethylene-responsiveness
GhPHD108	ERE	ATTTTAAA	471	8	-	Nicotiana glutinos	ethylene-responsiveness
GhPHD108	ERE	ATTTTAAA	1146	8	+	Nicotiana glutinos	ethylene-responsiveness
GhPHD108	ERE	ATTTTAAA	1148	8	-	Nicotiana glutinos	ethylene-responsiveness
GhPHD108	ERE	ATTTTAAA	1155	8	-	Nicotiana glutinos	ethylene-responsiveness
GhPHD108	TGA-element	AACGAC	1237	6	+	Brassica oleracea	auxin-responsive
GhPHD108	ABRE	ACGTG	1289	5	+	Arabidopsis thaliana	abscisic acid responsiveness
GhPHD108	ABRE	GACACGTGGC	1319	9	-	Triticum aestivum	abscisic acid responsiveness
GhPHD108	ABRE	CACGTG	1321	6	-	Arabidopsis thaliana	abscisic acid responsiveness
GhPHD108	ABRE	ACGTG	1322	5	+	Arabidopsis thaliana	abscisic acid responsiveness
GhPHD108	G-box	TAAACGTG	1286	8	+	Brassica oleracea	light responsiveness
GhPHD108	G-box	GCCACGTGGA	1319	9	+	Arabidopsis thaliana	light responsiveness
GhPHD108	G-box	CACGTG	1321	6	-	Arabidopsis thaliana	light responsiveness
GhPHD108	P-box	CCTTTTG	1332	7	-	Oryza sativa	gibberellin-responsiveness
GhPHD108	G-Box	CACGTT	1288	6	-	Pisum sativum	light responsiveness
GhPHD108	G-Box	CACGTG	1321	6	-	Pisum sativum	light responsiveness

## Sheet: classification
85 ethylene	67 abscisic acid response	64 gibberellin	55 MeJA	37 salicylic acid	26 auxin response	71 light	12 circadian	38 drought	36 low temperature	33 defense and stress responsiveness
GhPHD1	GhPHD1	GhPHD1	GhPHD3	GhPHD2	GhPHD1	GhPHD1	GhPHD10	GhPHD1	GhPHD4	GhPHD1
GhPHD2	GhPHD2	GhPHD2	GhPHD4	GhPHD5	GhPHD5	GhPHD2	GhPHD15	GhPHD3	GhPHD6	GhPHD2
GhPHD3	GhPHD5	GhPHD3	GhPHD5	GhPHD6	GhPHD15	GhPHD4	GhPHD26	GhPHD4	GhPHD7	GhPHD5
GhPHD4	GhPHD8	GhPHD5	GhPHD11	GhPHD7	GhPHD22	GhPHD5	GhPHD28	GhPHD6	GhPHD9	GhPHD10
GhPHD5	GhPHD9	GhPHD6	GhPHD13	GhPHD13	GhPHD38	GhPHD8	GhPHD29	GhPHD7	GhPHD10	GhPHD15
GhPHD6	GhPHD11	GhPHD7	GhPHD16	GhPHD16	GhPHD42	GhPHD11	GhPHD41	GhPHD8	GhPHD15	GhPHD18
GhPHD7	GhPHD12	GhPHD11	GhPHD20	GhPHD17	GhPHD46	GhPHD12	GhPHD51	GhPHD10	GhPHD21	GhPHD19
GhPHD8	GhPHD13	GhPHD13	GhPHD21	GhPHD24	GhPHD47	GhPHD13	GhPHD56	GhPHD11	GhPHD26	GhPHD20
GhPHD9	GhPHD14	GhPHD14	GhPHD22	GhPHD25	GhPHD54	GhPHD14	GhPHD75	GhPHD19	GhPHD27	GhPHD24
GhPHD11	GhPHD15	GhPHD17	GhPHD23	GhPHD30	GhPHD56	GhPHD15	GhPHD78	GhPHD20	GhPHD28	GhPHD26
GhPHD12	GhPHD17	GhPHD18	GhPHD25	GhPHD31	GhPHD57	GhPHD17	GhPHD83	GhPHD22	GhPHD31	GhPHD33
GhPHD13	GhPHD18	GhPHD19	GhPHD27	GhPHD32	GhPHD62	GhPHD18	GhPHD103	GhPHD26	GhPHD37	GhPHD34
GhPHD14	GhPHD19	GhPHD20	GhPHD29	GhPHD36	GhPHD65	GhPHD19		GhPHD27	GhPHD40	GhPHD38
GhPHD15	GhPHD20	GhPHD21	GhPHD30	GhPHD38	GhPHD66	GhPHD20		GhPHD32	GhPHD43	GhPHD42
GhPHD16	GhPHD24	GhPHD22	GhPHD31	GhPHD40	GhPHD69	GhPHD22		GhPHD37	GhPHD44	GhPHD45
GhPHD18	GhPHD25	GhPHD26	GhPHD34	GhPHD41	GhPHD79	GhPHD24		GhPHD38	GhPHD45	GhPHD46
GhPHD21	GhPHD26	GhPHD27	GhPHD36	GhPHD47	GhPHD80	GhPHD25		GhPHD40	GhPHD46	GhPHD49
GhPHD24	GhPHD28	GhPHD28	GhPHD40	GhPHD48	GhPHD88	GhPHD26		GhPHD44	GhPHD48	GhPHD50
GhPHD25	GhPHD29	GhPHD30	GhPHD42	GhPHD49	GhPHD91	GhPHD28		GhPHD45	GhPHD51	GhPHD56
GhPHD27	GhPHD30	GhPHD31	GhPHD43	GhPHD51	GhPHD95	GhPHD29		GhPHD47	GhPHD58	GhPHD57
GhPHD28	GhPHD31	GhPHD33	GhPHD45	GhPHD53	GhPHD96	GhPHD30		GhPHD50	GhPHD60	GhPHD58
GhPHD31	GhPHD34	GhPHD37	GhPHD47	GhPHD55	GhPHD98	GhPHD31		GhPHD52	GhPHD63	GhPHD60
GhPHD32	GhPHD36	GhPHD42	GhPHD50	GhPHD56	GhPHD101	GhPHD33		GhPHD53	GhPHD64	GhPHD61
GhPHD34	GhPHD38	GhPHD43	GhPHD51	GhPHD63	GhPHD105	GhPHD34		GhPHD54	GhPHD67	GhPHD62
GhPHD35	GhPHD39	GhPHD46	GhPHD53	GhPHD65	GhPHD107	GhPHD36		GhPHD55	GhPHD75	GhPHD68
GhPHD36	GhPHD40	GhPHD47	GhPHD55	GhPHD67	GhPHD108	GhPHD38		GhPHD62	GhPHD76	GhPHD69
GhPHD37	GhPHD42	GhPHD48	GhPHD56	GhPHD70		GhPHD39		GhPHD66	GhPHD77	GhPHD71
GhPHD38	GhPHD43	GhPHD50	GhPHD57	GhPHD85		GhPHD40		GhPHD68	GhPHD81	GhPHD80
GhPHD39	GhPHD44	GhPHD51	GhPHD60	GhPHD86		GhPHD42		GhPHD74	GhPHD83	GhPHD82
GhPHD40	GhPHD47	GhPHD54	GhPHD62	GhPHD89		GhPHD43		GhPHD79	GhPHD84	GhPHD87
GhPHD41	GhPHD48	GhPHD55	GhPHD65	GhPHD92		GhPHD44		GhPHD81	GhPHD85	GhPHD88
GhPHD42	GhPHD50	GhPHD56	GhPHD66	GhPHD93		GhPHD47		GhPHD91	GhPHD88	GhPHD95
GhPHD43	GhPHD51	GhPHD57	GhPHD70	GhPHD94		GhPHD48		GhPHD93	GhPHD90	GhPHD99
GhPHD44	GhPHD53	GhPHD58	GhPHD73	GhPHD97		GhPHD50		GhPHD98	GhPHD91
GhPHD46	GhPHD54	GhPHD60	GhPHD74	GhPHD100		GhPHD51		GhPHD99	GhPHD104
GhPHD47	GhPHD56	GhPHD61	GhPHD76	GhPHD102		GhPHD53		GhPHD101	GhPHD105
GhPHD49	GhPHD57	GhPHD62	GhPHD78	GhPHD106		GhPHD54		GhPHD103
GhPHD50	GhPHD59	GhPHD63	GhPHD79			GhPHD56		GhPHD106
GhPHD53	GhPHD60	GhPHD64	GhPHD81			GhPHD57
GhPHD54	GhPHD62	GhPHD65	GhPHD82			GhPHD60
GhPHD55	GhPHD64	GhPHD66	GhPHD83			GhPHD62
GhPHD56	GhPHD65	GhPHD67	GhPHD84			GhPHD65
GhPHD57	GhPHD66	GhPHD71	GhPHD85			GhPHD66
GhPHD58	GhPHD68	GhPHD72	GhPHD88			GhPHD67
GhPHD59	GhPHD69	GhPHD74	GhPHD89			GhPHD68
GhPHD60	GhPHD70	GhPHD76	GhPHD90			GhPHD69
GhPHD61	GhPHD71	GhPHD78	GhPHD92			GhPHD70
GhPHD62	GhPHD73	GhPHD80	GhPHD95			GhPHD71
GhPHD64	GhPHD75	GhPHD81	GhPHD96			GhPHD73
GhPHD65	GhPHD80	GhPHD82	GhPHD97			GhPHD74
GhPHD66	GhPHD83	GhPHD83	GhPHD99			GhPHD75
GhPHD67	GhPHD84	GhPHD85	GhPHD100			GhPHD80
GhPHD68	GhPHD85	GhPHD86	GhPHD101			GhPHD83
GhPHD69	GhPHD88	GhPHD87	GhPHD102			GhPHD84
GhPHD70	GhPHD89	GhPHD90	GhPHD103			GhPHD85
GhPHD71	GhPHD92	GhPHD95				GhPHD87
GhPHD72	GhPHD93	GhPHD96				GhPHD88
GhPHD75	GhPHD95	GhPHD98				GhPHD89
GhPHD76	GhPHD96	GhPHD101				GhPHD92
GhPHD77	GhPHD97	GhPHD103				GhPHD93
GhPHD78	GhPHD100	GhPHD105				GhPHD95
GhPHD80	GhPHD101	GhPHD106				GhPHD96
GhPHD81	GhPHD103	GhPHD107				GhPHD97
GhPHD82	GhPHD104	GhPHD108				GhPHD98
GhPHD84	GhPHD105					GhPHD100
GhPHD85	GhPHD107					GhPHD101
GhPHD86	GhPHD108					GhPHD103
GhPHD88						GhPHD104
GhPHD89						GhPHD105
GhPHD90						GhPHD107
GhPHD91						GhPHD108
GhPHD92
GhPHD93
GhPHD94
GhPHD95
GhPHD98
GhPHD99
GhPHD100
GhPHD102
GhPHD103
GhPHD104
GhPHD105
GhPHD106
GhPHD107
GhPHD108
