# Supplementary material
Source: Research Square preprint supplement (doi:10.21203/rs.3.rs-13118/v4)
Supplement: Supplementary file 2 [file 4e641e2cd353f2fb033ae559.docx]

**Table S7.** Primers for qRT-PCR in this study.

| **Gene** | **Forward primer (5'-3')** | **Reverse primer (5'-3')** |
| --- | --- | --- |
| histone3 | TCAAGACTGATTTGCGTTTCCA | GCGCAAAGGTTGGTGTCTTC |
| GhPHD5 | GAGTGATACGACGAGTATGGGTGT | GACTCAGAACCGGCAAGTGTGT |
| GhPHD18 | TTGTGGGGCTTGTGGAGATAGC | TTGCCATGGAACCATCTCTCGC |
| GhPHD23 | GGACTGGTTGTCTTTGGTTGC | TGTTTCTTAGTTGCCCCTGT |
| GhPHD24 | TTGCTTGCTGTTGCTTTCTA | CTTTTGCTGCTGCCATTGTG |
| GhPHD34 | TTGTTCGTCCTGGTGATTGCGT | ATGGTCGGCCTCGATCTTCTCT |
| GhPHD40 | CCTTAGCTCCCAAGTCCAAA | CCTTCCTCCAAGTGATTCCT |
| GhPHD43 | CCAACTCAAAAGCGCGGGAATC | GCTCGTCTTCGTCTTCCTCGTC |
| GhPHD72 | CCAAATGAGACATGGGAAGT | CCAAAATAGAAAGCAACAGC |
| GhPHD77 | TGGAGAGACGTTATGTGGGGCT | CGCCCTTGCCGGTGTTATCTTA |
| GhPHD80 | GAGGATGAAGAAGAGCAGGGCG | TCATTTCTGCCTTCGCTGGTGT |
| GhPHD88 | CGTCCTGGTGATTGTGTGCTGA | ATGGTCGGCCTCGATCTTCTCT |
| GhPHD107 | TGCTCAACTCTATCAGTGCCGC | GGTACCATGTGAACCTCGCTCC |
